# Supplementary material for: Farming Practice Influences Antimicrobial Resistance Burden of Non-Aureus Staphylococci in Pig Husbandries
Source: MDPI journal article supplement (doi:10.3390/microorganisms11010031), 2022-12-22
Supplement: s1 [file s1]

Table S1: Species distribution in the population (p<0.03) \*)

| NAS species              | Number of isolates in each farm type |                    |                | Number of isolates in each sample type |                               | X <sup>2</sup>               | p       | X <sup>2</sup>           | p      | X <sup>2</sup>              | p         |
|--------------------------|--------------------------------------|--------------------|----------------|----------------------------------------|-------------------------------|------------------------------|---------|--------------------------|--------|-----------------------------|-----------|
|                          | Conventional (n=145)                 | Alternative (n=54) | Organic (n=41) | Pig commensal isolates (n=144)         | Environmental isolates (n=96) | Conventional vs. alternative |         | Conventional vs. organic |        | Commensal vs. environmental |           |
| <i>S. arlettae</i>       | -                                    | 2                  | -              | 2                                      | 0                             | 2.3409                       | 0.126   | NA                       | NA     | 0.18908                     | 0.6637    |
| <i>S. chromogenes</i>    | 6                                    | 6                  | -              | 1                                      | 11                            | 2.2579                       | 0.1329  | 0.67814                  | 0.4102 | 11.875                      | 0.0005689 |
| <i>S. cohnii</i>         | 6                                    | 4                  | 2              | 7                                      | 5                             | 0.32935                      | 0.566   | 2.1174e-30               | 1      | 3.6706e-30                  | 1         |
| <i>S. epidermidis</i>    | 11                                   | 3                  | -              | 13                                     | 1                             | 0.03474                      | 0.8521  | 2.083                    | 0.1489 | 3.9803                      | 0.04604   |
| <i>S. felis</i>          | 1                                    | -                  | -              | 1                                      | 0                             | 1.3654e-31                   | 1       | 8.5693e-32               | 1      | 5.8278e-31                  | 1         |
| <i>S. haemolyticus</i>   | 23                                   | 2                  | 2              | 6                                      | 21                            | 4.2461                       | 0.03934 | 2.4376                   | 0.1185 | 16.361                      | 5.236e-05 |
| <i>S. hominis</i>        | 5                                    | -                  | -              | 0                                      | 5                             | 0.76167                      | 0.3828  | 0.43366                  | 0.5102 | 5.3191                      | 0.02109   |
| <i>M. lentus</i>         | -                                    | 3                  | 2              | 5                                      | 0                             | 4.8652                       | 0.0274  | 3.2995                   | 0.0693 | 1.9149                      | 0.1664    |
| <i>S. muscae</i>         | 1                                    | -                  | -              | 1                                      | 0                             | 1.3654e-31                   | 1       | 8.5693e-32               | 1      | 5.8278e-31                  | 1         |
| <i>S. pasteurii</i>      | 12                                   | 1                  | 1              | 7                                      | 7                             | 1.7113                       | 0.1908  | 0.89751                  | 0.3435 | 0.25601                     | 0.6129    |
| <i>S. pettenkoferi</i>   | 1                                    | -                  | -              | 1                                      | 0                             | 1.3654e-31                   | 1       | 8.5693e-32               | 1      | 5.8278e-31                  | 1         |
| <i>S. piscifermentas</i> | 5                                    | -                  | -              | 5                                      | 0                             | 0.76167                      | 0.3828  | 0.43366                  | 0.5102 | 1.9149                      | 0.1664    |
| <i>S. saprophyticus</i>  | -                                    | 1                  | 1              | 0                                      | 2                             | 0.26574                      | 0.6062  | 0.45729                  | 0.4989 | 1.0294                      | 0.3103    |
| <i>M. sciuri</i>         | -                                    | -                  | 1              | 1                                      | 0                             | NA                           | NA      | 0.45729                  | 0.4989 | 5.8278e-31                  | 1         |
| <i>S. simulans</i>       | 66                                   | 28                 | 15             | 69                                     | 40                            | 0.40482                      | 0.5246  | 0.70572                  | 0.4009 | 0.67302                     | 0.412     |
| <i>S. warneri</i>        | 7                                    | 1                  | -              | 7                                      | 1                             | 0.29644                      | 0.5861  | 0.93975                  | 0.3323 | 1.5571                      | 0.2121    |
| <i>S. xyloso</i>         | 1                                    | 3                  | 17             | 18                                     | 3                             | 2.582                        | 0.1081  | 0.93975                  | 0.3323 | 5.2207                      | 0.02232   |

\*) Statistical analysis was performed using the 2-sample test for equality of proportions with continuity correction as described in Materials and Methods. Statistically significant results are highlighted in red. Borderline values are marked in green.
