# Supplementary material for: Farming Practice Influences Antimicrobial Resistance Burden of Non-Aureus Staphylococci in Pig Husbandries
Source: MDPI journal article supplement (doi:10.3390/microorganisms11010031), 2022-12-22
Supplement: s1 [file s1]

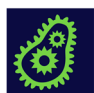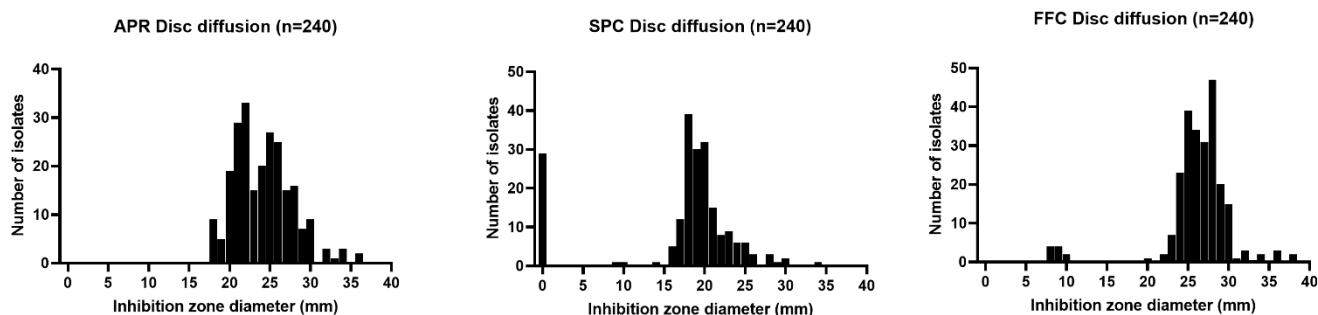

**Figure S1.** Inhibition zone distributions. The inhibition zone diameters (mm) of the NAS isolates are depicted in the x-axis of the graph. Depending on the diameter of the inhibition zone, the isolates were classified as resistant (R), susceptible (S) or intermediate (I) for each antibiotic tested: SPC (R: 0 mm; I: 9 to 10 mm), FFC (R: 8 to 10 mm).

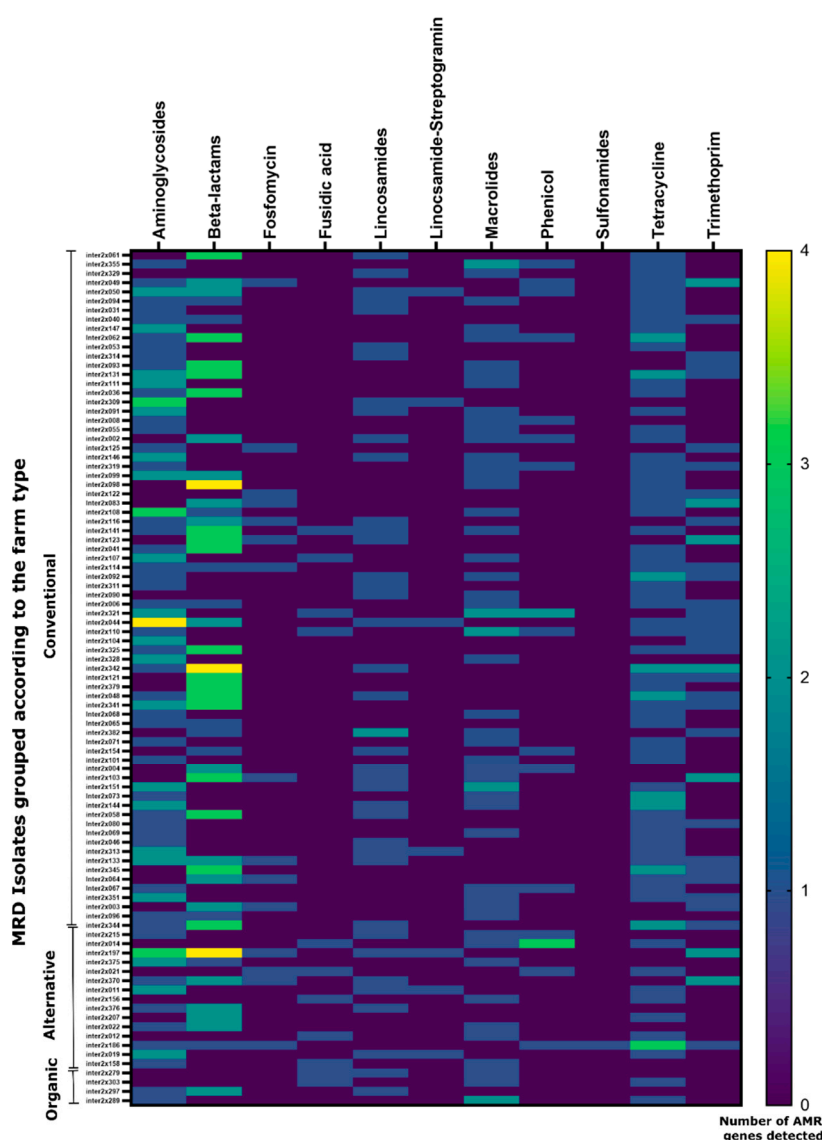

**Figure S2.** Heat map representation of the antimicrobial genes detected in MRD isolates. In the y-axis, the MRD isolates are classified according to farm type. The number of AMR genes detected in each antibiotic class is depicted by the legend in the right side.
