# Supplementary material for: Farming Practice Influences Antimicrobial Resistance Burden of Non-Aureus Staphylococci in Pig Husbandries
Source: MDPI journal article supplement (doi:10.3390/microorganisms11010031), 2022-12-22
Supplement: s1 [file s1]

**Supplementary Table S3**

(i) Number of isolates displaying phenotypic and genotypic resistance for the antibiotic classes tested

| Resistance details                    |                                   | Conventional farms<br>(n=145) | Alternative farms<br>(n=54) | Organic farms<br>(n=41) | Resistance spectrum mediated by<br>AMR gene    |
|---------------------------------------|-----------------------------------|-------------------------------|-----------------------------|-------------------------|------------------------------------------------|
| <b>Aminoglycosides</b>                |                                   |                               |                             |                         |                                                |
| Phenotypic resistance                 | Gentamycin                        | 2                             | 0                           | 0                       |                                                |
|                                       | Apramycin                         | 0                             | 0                           | 0                       |                                                |
|                                       | Spectinomycin                     | 22                            | 7                           |                         |                                                |
| Genotypic resistance                  | <i>ant(9)-Ia</i>                  | 6                             | 4                           | 0                       | Spectinomycin                                  |
|                                       | <i>ant(6)-Ia</i>                  | 4                             | 3                           | 0                       | Streptomycin                                   |
|                                       | <i>aaD1</i>                       | 16                            | 1                           | 0                       | Kanamycin, Tobramycin                          |
|                                       | <i>aac(6')-Ie/aph(2'')-Ia</i>     | 1                             | 0                           | 0                       | Gentamycin, Amikacin, Tobramycin,<br>Kanamycin |
|                                       | <i>spd</i>                        | 16                            | 0                           | 0                       | Spectinomycin                                  |
|                                       | <i>spw</i>                        | 4                             | 3                           | 0                       | Spectinomycin                                  |
|                                       | at least one AMR gene             | 35                            | 7                           | 0                       |                                                |
| <b>Beta-lactams</b>                   |                                   |                               |                             |                         |                                                |
| Phenotypic resistance                 |                                   | ND                            | ND                          | ND                      |                                                |
| Genotypic resistance                  | <i>blaZ</i>                       | 38                            | 10                          | 1                       |                                                |
|                                       | <i>blaPC1</i>                     | 11                            | 1                           | 1                       |                                                |
|                                       | <i>blaARL-1</i>                   | 0                             | 2                           | 0                       |                                                |
|                                       | at least one AMR gene             | 49                            | 13                          | 2                       |                                                |
| <b>Cefoxitin/oxacillin resistance</b> |                                   |                               |                             |                         |                                                |
| Phenotypic resistance                 | Cefoxitin and Oxacillin<br>(n=18) | 15                            | 2                           | 1                       |                                                |
|                                       | Cefoxitin only (n=2)              | 1                             | 1                           | 0                       |                                                |
|                                       | Oxacillin only (n=13)             | 2                             | 4                           | 7                       |                                                |
| Genotypic resistance                  | <i>mecA</i> (n=11)                | 10                            | 1                           | 0                       |                                                |
| <b>Fosfomycin</b>                     |                                   |                               |                             |                         |                                                |

|                                                   |                       |    |    |    |                                           |
|---------------------------------------------------|-----------------------|----|----|----|-------------------------------------------|
| Phenotypic resistance                             | Fosfomycin            | 57 | 9  | 9  |                                           |
| Genotypic resistance                              | <i>fosD</i>           | 0  | 1  | 3  |                                           |
|                                                   | <i>fosB</i>           | 11 | 3  | 0  |                                           |
|                                                   | at least one AMR gene | 11 | 4  | 3  |                                           |
| <b>Fusidic acid</b>                               |                       |    |    |    |                                           |
| Phenotypic resistance                             | Fusidic acid          | 20 | 13 | 25 |                                           |
| Genotypic resistance                              | <i>fusD</i>           | 0  | 1  | 1  |                                           |
|                                                   | <i>fusF</i>           | 5  | 4  | 2  |                                           |
|                                                   | at least one AMR gene | 5  | 5  | 3  |                                           |
| <b>Macrolides (-lincosamides streptogramin B)</b> |                       |    |    |    |                                           |
| Phenotypic resistance                             | Erythromycin          | 56 | 11 | 4  |                                           |
| Genotypic resistance                              | <i>msrA</i>           | 5  | 4  | 3  | Macrolides, Streptogramin B               |
|                                                   | <i>mphC</i>           | 0  | 3  | 3  | Macrolides                                |
|                                                   | <i>ermT</i>           | 1  | 0  | 0  | Macrolides, Lincosamides, Streptogramin B |
|                                                   | <i>ermC</i>           | 45 | 1  | 1  |                                           |
|                                                   | <i>ermA</i>           | 5  | 4  | 0  |                                           |
|                                                   | <i>erm43</i>          | 0  | 0  | 1  |                                           |
|                                                   | at least one AMR gene | 52 | 12 | 5  |                                           |
| <b>Lincosamides (- streptogramins)</b>            |                       |    |    |    |                                           |
| Phenotypic resistance                             | Clindamycin           | 81 | 17 | 6  |                                           |
|                                                   | Quinupristin          | 2  | 0  | 0  |                                           |
| Genotypic resistance                              | <i>vga(E)</i>         | 0  | 1  | 0  | Lincosamides, Streptogramin A             |
|                                                   | <i>vga(L)C</i>        | 7  | 0  | 0  |                                           |
|                                                   | <i>vga(A)</i>         | 12 | 2  | 4  |                                           |
|                                                   | <i>sal(A)</i>         | 0  | 0  | 1  |                                           |
|                                                   | <i>lsa(E)</i>         | 4  | 3  | 0  |                                           |
|                                                   | <i>lnu(B)</i>         | 4  | 3  | 0  | Lincosamides                              |
|                                                   | <i>lnu(A)'</i>        | 2  | 2  | 1  |                                           |
|                                                   | <i>lnu(A)</i>         | 10 | 1  | 4  |                                           |
|                                                   | at least one AMR gene | 33 | 9  | 9  |                                           |
| <b>Phenicol</b>                                   |                       |    |    |    |                                           |
| Phenotypic resistance                             | Chloramphenicol       | 15 | 6  | 0  |                                           |

|                       |                       |    |    |    |  |
|-----------------------|-----------------------|----|----|----|--|
|                       | Florfenicol           | 8  | 2  | 0  |  |
| Genotypic resistance  | <i>cmx</i>            | 0  | 1  | 0  |  |
|                       | <i>catA</i>           | 7  | 4  | 0  |  |
|                       | <i>fexA</i>           | 8  | 2  | 0  |  |
|                       | at least one AMR gene | 14 | 6  | 0  |  |
| <b>Sulfonamides</b>   |                       |    |    |    |  |
| Phenotypic resistance |                       | ND | ND | ND |  |
| Genotypic resistance  | <i>sul1</i>           | 0  | 1  | 0  |  |
| <b>Tetracycline</b>   |                       |    |    |    |  |
| Phenotypic resistance | Tetracycline          | 77 | 12 | 13 |  |
| Genotypic resistance  | <i>tet(33)</i>        | 0  | 1  | 0  |  |
|                       | <i>tet(K)</i>         | 64 | 11 | 3  |  |
|                       | <i>tet(L)</i>         | 18 | 0  | 0  |  |
|                       | <i>tet(M)</i>         | 11 | 0  | 1  |  |
|                       | <i>tet(Z)</i>         | 0  | 2  | 0  |  |
|                       | at least one AMR gene | 80 | 11 | 4  |  |
| <b>Trimethoprim</b>   |                       |    |    |    |  |
| Phenotypic resistance | Trimethoprim          | 11 | 1  | 2  |  |
| Genotypic resistance  | <i>dfrC</i>           | 23 | 3  | 0  |  |
|                       | <i>dfrD</i>           | 5  | 0  | 0  |  |
|                       | <i>dfrG</i>           | 6  | 2  | 0  |  |
|                       | <i>dfrK</i>           | 6  | 0  | 2  |  |
|                       | at least one AMR gene | 34 | 3  | 2  |  |

(ii) Statistical analysis data of phenotypic and genotypic resistance distribution in the different farm types\*).

|                                                                                   | Conventional<br>(n=145) | Alternative<br>(n=54) | $\chi^2$   | p value   | Organic<br>(n=41) | $\chi^2$   | p value   |
|-----------------------------------------------------------------------------------|-------------------------|-----------------------|------------|-----------|-------------------|------------|-----------|
| <b>(a) Phenotypic resistance screening</b> (significance threshold $p < 0.0011$ ) |                         |                       |            |           |                   |            |           |
| Cefoxitin                                                                         | 16                      | 3                     | 0.80682    | 0.3691    | 1                 | 1.9027     | 0.1678    |
| Oxacillin                                                                         | 17                      | 6                     | 6.2401e-31 | 1         | 8                 | 1.0641     | 0.3023    |
| Gentamicin                                                                        | 2                       | 0                     | 0.0046605  | 0.9456    | 0                 | 3.1959e-31 | 1         |
| Levofloxacin                                                                      | 2                       | 0                     | 0.0046605  | 0.9456    | 0                 | 3.1959e-31 | 1         |
| Erythromycin                                                                      | 56                      | 11                    | 5.0795     | 0.02421   | 4                 | 10.901     | 0.000961  |
| Clindamycin                                                                       | 81                      | 17                    | 8.4074     | 0.003737  | 6                 | 20.197     | 6.985e-06 |
| Linezolid                                                                         | 1                       | 0                     | 1.3654e-31 | 1         | 1                 | 0.010287   | 0.9192    |
| Daptomycin                                                                        | 0                       | 0                     | NA         | NA        | 1                 | 0.45729    | 0.4989    |
| Teicoplanin                                                                       | 6                       | 0                     | 1.1062     | 0.2929    | 0                 | 0.67814    | 0.4102    |
| Vancomycin                                                                        | 0                       | 0                     | NA         | NA        | 0                 | NA         | NA        |
| Tetracycline                                                                      | 77                      | 12                    | 13.955     | 0.0001873 | 13                | 5.0336     | 0.02486   |
| Tigecycline                                                                       | 1                       | 0                     | 1.3654e-31 | 1         | 0                 | 8.5693e-32 | 1         |
| Fosfomycin                                                                        | 57                      | 9                     | 8.1086     | 0.004406  | 9                 | 3.4831     | 0.062     |
| Fusidic acid                                                                      | 20                      | 13                    | 2.3092     | 0.1286    | 25                | 36.267     | 1.721e-09 |
| Rifampicin                                                                        | 0                       | 1                     | 0.26574    | 0.6062    | 0                 | NA         | NA        |
| Trimethoprim                                                                      | 11                      | 1                     | 1.3834     | 0.2395    | 2                 | 0.064326   | 0.7998    |
| Apramycin                                                                         | 0                       | 0                     | NA         | NA        | 0                 | NA         | NA        |
| Chloramphenicol                                                                   | 15                      | 6                     | 7.1608e-31 | 1         | 0                 | 3.3236     | 0.06829   |
| Florfenicol                                                                       | 8                       | 2                     | 0.024289   | 0.8762    | 0                 | 1.2134     | 0.2707    |
| Spectinomycin                                                                     | 22                      | 7                     | 0.02785    | 0.8675    | 0                 | 5.6753     | 0.01721   |
| Quinupristin                                                                      | 2                       | 0                     | 0.0046605  | 0.9456    | 0                 | 3.1959e-31 | 1         |
| Ciprofloxacin                                                                     | 6                       | 0                     | 1.1062     | 0.2929    | 0                 | 0.67814    | 0.4102    |
| <b>(b) Genotypic resistance screening</b> (significance threshold $p < 0.0022$ )  |                         |                       |            |           |                   |            |           |
| Aminoglycoside                                                                    | 35                      | 7                     | 2.318      | 0.1279    | 0                 | 10.662     | 0.001094  |
| Beta-lactams                                                                      | 49                      | 13                    | 1.3093     | 0.2525    | 2                 | 12.014     | 0.0005279 |
| Cefoxitin/oxacillin<br>resistance                                                 | 10                      | 1                     | 1.0731     | 0.3002    | 0                 | 1.7864     | 0.1814    |

|                                                                                           |    |    |            |           |    |            |           |
|-------------------------------------------------------------------------------------------|----|----|------------|-----------|----|------------|-----------|
| Fosfomycin                                                                                | 11 | 4  | 3.5561e-31 | 1         | 3  | 3.7204e-31 | 1         |
| Fusidic acid                                                                              | 5  | 5  | 1.6995     | 0.1924    | 3  | 0.41237    | 0.5208    |
| Macrolides<br>(-lincosamides -<br>streptogramin B)                                        | 52 | 12 | 2.7592     | 0.0967    | 5  | 7.3466     | 0.006719  |
| Lincosamides<br>(- streptogramins)                                                        | 33 | 9  | 0.54926    | 0.4586    | 9  | 5.7516e-31 | 1         |
| Phenicol                                                                                  | 14 | 6  | 0.0014926  | 0.9692    | 0  | 3.006      | 0.08295   |
| Sulfonamides                                                                              | 0  | 1  | 0.26574    | 0.6062    | 0  | NA         | NA        |
| Tetracycline                                                                              | 80 | 11 | 17.826     | 2.421e-05 | 4  | 24.818     | 6.301e-07 |
| Trimethoprim                                                                              | 34 | 3  | 7.1823     | 0.007363  | 2  | 5.922      | 0.01495   |
| <b>(c) Multiple resistance determinant (MRD) analysis</b> (significance threshold p<0.05) |    |    |            |           |    |            |           |
| Phenotypic MRD isolates                                                                   | 74 | 18 | 4.2731     | 0.03872   | 10 | 8.1178     | 0.004383  |
| Genotypic MRD isolates                                                                    | 74 | 15 | 7.6935     | 0.005542  | 4  | 20.703     | 5.363e-06 |

\*) Statistical analysis was performed using the 2-sample test for equality of proportions with continuity correction as described in Materials and Methods. Alternative and organic farms were compared each with conventional farms as the baseline. Statistically significant results are highlighted in red. Borderline values are marked in green.
