# Supplementary material for: Farming Practice Influences Antimicrobial Resistance Burden of Non-Aureus Staphylococci in Pig Husbandries
Source: Microorganisms. 2022 Dec 22;11(1):31. doi: 10.3390/microorganisms11010031 (PMC9865537; doi:10.3390/microorganisms11010031)
Supplement: Supplementary file 1 [file microorganisms-11-00031-s001.zip]

Archive with 4 entries (4 files):
- microorganisms-2101959-supplementary-main.pdf
- Table S1_statistics_.pdf
- Table S2_Metadata_Phenotypic and Genotypic_revised.xlsx
- Table S3.pdf
