# Supplementary material for: Farming Practice Influences Antimicrobial Resistance Burden of Non-Aureus Staphylococci in Pig Husbandries
Source: Microorganisms. 2022 Dec 22;11(1):31. doi: 10.3390/microorganisms11010031 (PMC9865537; doi:10.3390/microorganisms11010031)
Supplement: Supplementary file 1 [file microorganisms-11-00031-s001.zip › Table S2_Metadata_Phenotypic and Genotypic_revised.xlsx]

## Sheet: Phenotypic AST screening data
																																			No BP, No ECOFF		BP 18		No BP, No ECOFF		No BP, No ECOFF		BP 18		BP 24
																																					IF(xx<18,"R","S")						IF(xxx<18,"R","S")		IF(xxx<24,"R","S")
		VITEK																																	Disk Diffusion
			Cefoxitin	Oxacillin		Gentamicin		Levofloxacin		Inducible Clindamycin	Erythromycin		Clindamycin		Linezolid		Daptomycin		Teicoplanin		Vancomycin		Tetracycline		Tigecycline		Fosfomycin		Fusidic acid		Rifampicin		Trimethoprim/sulfamethoxazol		Apramycin (15 µg)		Chloramphenicol (30 µg)		Florfenicol (30 µg)		Spectinomycin (100 µg)		Quinupristin (15 µg)		Ciprofloxacin (5 µg)
Isolate ID	Farm Type	Species	Screen	MIC	R/S	MIC	R/S	MIC	R/S	neg/pos	MIC	R/S	MIC	R/S	MIC	R/S	MIC	R/S	MIC	R/S	MIC	R/S	MIC	R/S	MIC	R/S	MIC	R/S	MIC	R/S	MIC	R/S	MIC	R/S	Diameter	R/S	Diameter	R/S	Diameter	R/S	Diameter	R/S	Diameter	R/S	Diameter	R/S
inter2x002	Conventional	S. simulans	neg	≤0.25	S	≤0.5	S	≤0.12	I	neg	>4	R	>2*	R	2	S	≤0.12	S	0.5	S	≤0.5	S	≤1	S	≤0.12	S	≤8	S	≤0.5	s	≤0.03	S	≤10	S	36	S	9	R	34	S	26	S	18	S	42	S
inter2x003	Conventional	S. epidermidis	neg	≤0.25	S	≤0.5	S	≤0.12	I	neg	>4	R	>2	R	1	S	0.25	S	4	S	≤0.5	S	≤1	S	≤0.12	S	≤8	S	≤0.5	s	≤0.03	S	≤10	S	19	S	19	S	24	S	20	S	26	S	27	S
inter2x004	Conventional	S. simulans	neg	≤0.25	S	≤0.5	S	≤0.12	I	neg	>4	R	>2*	R	2	S	≤0.12	S	≤0,5	S	≤0.5	S	≤1	S	≤0.12	S	≤8	S	≤0.5	s	≤0.03	S	≤10	S	34	S	11	R	30	S	25	S	21	S	38	S
inter2x006	Conventional	S. warneri	neg	≤0.25	S	≤0.5	S	≤0.12	I	neg	>4	R	>2	R	1	S	0.5	S	1	S	≤0.5	S	>8	R	0.5	S	>64	R	≤0.5	s	≤0.03	S	20	S	21	S	22	S	24	S	0	R	25	S	38	S
inter2x008	Conventional	S. haemolyticus	neg	≤0.25	S	≤0.5	S	0.5	I	neg	>4	R	>2	R	1	S	0.25	S	2	S	≤0.5	S	≤1	S	≤0.12	S	≤8	S	≤0.5	s	≤0.03	S	≤10	S	22	S	8	R	8	R	21	S	20	S	26	S
inter2x023	Conventional	S. simulans	neg	≤0.25	S	≤0.5	S	≤0.12	I	neg	0.5	S	0.5	I	1	S	≤0.12	S	1	S	≤0.5	S	≤1	S	≤0.12	S	≤8	S	≤0.5	s	≤0.03	S	≤10	S	24	S	25	S	26	S	19	S	25	S	30	S
inter2x025	Conventional	S. felis	neg	≤0.25	S	≤0.5	S	≤0.12	I	neg	0.5	S	≤0.12	S	1	S	≤0.12	S	4	S	1	S	≤1	S	≤0.12	S	≤8	R	8	R	≤0.03	S	≤10	S	25	S	29	S	27	S	18	S	29	S	33	S
inter2x026	Conventional	S. simulans	neg	≤0.25	S	≤0.5	S	0.25	I	neg	≤0.25	S	≤0.12	S	1	S	≤0.12	S	≤0.5	S	≤0.5	S	≤1	S	≤0.12	S	≤8	S	≤0.5	s	≤0.03	S	≤10	S	25	S	23	S	25	S	16	S	24	S	31	S
inter2x028	Conventional	S. simulans	neg	≤0.25	S	≤0.5	S	≤0.12	I	neg	≤0.25	S	0.25	S	1	S	≤0.12	S	≤0.5	S	≤0.5	S	≤1	S	≤0.12	S	≤8	S	≤0.5	s	≤0.03	S	≤10	S	27	S	25	S	24	S	18	S	25	S	32	S
inter2x029	Conventional	S. simulans	neg	≤0.25	S	≤0.5	S	≤0.12	I	neg	≤0.25	S	>2*	R	2	S	≤0.12	S	1	S	≤0.5	S	≤1	S	≤0.12	S	≤8	S	≤0.5	s	≤0.03	S	≤10	S	20	S	22	S	25	S	20	S	22	S	30	S
inter2x030	Conventional	S. pasteuri	neg	0.5	S	≤0.5	S	≤0.12	I	neg	≤0.25	S	1	S	1	S	0.25	S	≤0.5	S	≤0.5	S	>8	R	≤0.12	S	> 64	R	≤0.5	R	≤0.03	S	≤10	S	20	S	19	S	20	S	16	S	20	S	24	S
inter2x031	Conventional	S. haemolyticus	neg	0.5	S	≤0.5	S	0.5	I	neg	0.5	S	>2	R	1	S	0.25	S	2	S	≤0.5	S	>8	R	≤0.12	S	64	R	≤0.5	s	≤0.03	S	≤10	S	23	S	24	S	25	S	20	S	21	S	25	S
inter2x033	Conventional	S. cohnii	neg	0.5	R	≤0.5	S	0.25	I	neg	4	R	0.5	I	2	S	0.25	S	2	S	≤0.5	S	≤1	S	≤0.12	S	> 64	R	8	R	0.12	I	≤10	S	30	S	28	S	29	S	24	S	22	S	32	S
inter2x034	Conventional	S. simulans	neg	≤0.25	S	≤0.5	S	≤0.12	I	neg	≤0.25	S	0.25	S	1	S	≤0.12	S	1	S	≤0.5	S	≤1	S	≤0.12	S	≤8	S	≤0.5	S	≤0.03	S	≤10	S	25	S	23	S	25	S	19	S	27	S	34	S
inter2x035	Conventional	S. simulans	neg	≤0.25	S	≤0.5	S	≤0.12	I	neg	≤0.25	S	0.25	S	1	S	≤0.12	S	≤0.5	S	≤0.5	S	≤1	S	≤0.12	S	≤8	S	≤0.5	S	≤0.03	S	≤10	S	21	S	28	S	26	S	20	S	27	S	34	S
inter2x036	Conventional	S. simulans	neg	≤0.25	S	≤0.5	S	≤0.12	I	neg	≤0.25	S	0.25	S	1	S	≤0.12	S	1	S	≤0.5	S	≤1	S	≤0.12	S	≤8	S	≤0.5	S	≤0.03	S	≤10	S	24	S	24	S	26	S	22	S	27	S	32	S
inter2x038	Conventional	S. simulans	neg	≤0.25	S	≤0.5	S	≤0.12	I	neg	≤0.25	S	0.25	S	1	S	≤0.12	S	≤0.5	S	≤0.5	S	≤1	S	≤0.12	S	≤8	S	≤0.5	S	≤0.03	S	≤10	S	22	S	28	S	28	S	22	S	27	S	34	S
inter2x351	Conventional	S. piscifermentans	neg	≤ 0.25	S	≤0.5	S	≤ 0.12	I	neg	≥8	R	≥4	R	1	S	≤0.12	S	1	S	≤ 0.5	S	≥16	R	0.5	S	≤8	R	≤ 0.5	S	≤0.03	S	80	R	24	S	25	S	28	S	19	S	26	S	31	S
inter2x040	Conventional	S. simulans	neg	≤0.25	S	≤0.5	S	≤0.12	I	neg	≤0.25	S	0.25	S	1	S	≤0.12	S	≤0.5	S	≤0.5	S	≤1	S	≤0.12	S	≤8	S	≤0.5	S	≤0.03	S	≤10	S	26	S	26	S	28	S	18	S	26	S	28	S
inter2x041	Conventional	S. simulans	neg	≤0.25	S	≤0.5	S	≤0.12	I	neg	≤0.25	S	0.25	S	1	S	≤0.12	S	≤0.5	S	≤0.5	S	≤1	S	≤0.12	S	≤8	S	≤0.5	S	≤0.03	S	≤10	S	25	S	24	S	25	S	21	S	26	S	34	S
inter2x042	Conventional	S. haemolyticus	neg	≤0.25	S	≤0.5	S	0.5	I	neg	0.5	S	1	R	1	S	0.25	S	2	S	≤0.5	S	≤1	S	≤0.12	S	≤8	S	≤0.5	S	≤0.03	S	≤10	S	21	S	24	S	25	S	23	S	24	S	25	S
inter2x043	Conventional	S. simulans	neg	≤0.25	S	≤0.5	S	≤0.12	I	neg	≤0.25	S	0.25	S	1	S	≤0.12	S	≤0.5	S	≤0.5	S	≤1	S	≤0.12	S	≤8	S	≤0.5	S	≤0.03	S	≤10	S	27	S	26	S	29	S	19	S	26	S	32	S
inter2x044	Conventional	S. warneri	neg	≤0.25	S	4	R	≤0.12	I	neg	≤0.25	R	>2	R	1	S	0.5	S	1	S	≤0.5	S	>8	R	≤0.12	S	>64	R	≤0.5	S	≤0.03	S	≤10	S	22	S	23	S	25	S	0	R	20	S	32	S
inter2x045	Conventional	S. simulans	neg	≤0.25	S	≤0.5	S	≤0.12	I	neg	≤0.25	S	0.25	S	1	S	≤0.12	S	≤0.5	S	≤0.5	S	>8	R	≤0.12	S	≤8	S	≤0.5	S	≤0.03	S	≤10	S	24	S	24	S	25	S	19	S	24	S	30	S
inter2x046	Conventional	S. simulans	neg	≤0.25	S	≤0.5	S	≤0.12	I	neg	≤0.25	S	0.5	I	1	S	≤0.12	S	1	S	≤0.5	S	>8	R	≤0.12	S	≤8	S	≤0.5	S	≤0.03	S	≤10	S	26	S	25	S	30	S	22	S	26	S	32	S
inter2x047	Conventional	S. simulans	neg	≤0.25	S	≤0.5	S	≤0.12	I	neg	≤0.25	S	0.25	S	1	S	≤0.12	S	1	S	≤0.5	S	≤1	S	≤0.12	S	≤8	S	≤0.5	S	≤0.03	S	≤10	S	18	S	26	S	28	S	21	S	27	S	30	S
inter2x048	Conventional	S. hominis	neg	≤0.25	S	≤0.5	S	≤0.12	I	neg	≤0.25*	R	>2	R	2	S	≤0.12	S	1	S	1	S	>8	R	≤0.12	S	>64	R	≤0.5	S	≤0.03	S	≤10	S	23	S	22	S	23	S	16	S	19	S	32	S
inter2x049	Conventional	S. epidermidis	neg	≤0.25	S	≤0.5	S	≤0.12	I	neg	0.5	S	≤0.12	S	1	S	0.5	S	4	S	≤0.5	S	>8	R	≤0.12	S	≤8	S	≤0.5	S	≤0.03	S	20	S	20	S	8	R	8	R	18	S	24	S	31	S
inter2x050	Conventional	S. warneri	neg	≤0.25	S	≤0.5	S	≤0.12	I	neg	≤0.25*	R	>2	R	1	S	0.5	S	1	S	≤0.5	S	>8	R	≤0.12	S	>64	R	≤0.5	S	≤0.03	S	≤10	S	22	S	8	R	9	R	0	R	16	R	30	S
inter2x053	Conventional	S. pettenkoferi	pos	≤0.25	S	≤0.5	S	0.25	I	neg	≤0.25	S	0.25	S	≤0.5	S	0.25	S	1	S	≤0.5	S	≤1	S	≤0.12	S	64	R	≤0.5	R	≤0.03	S	≤10	S	29	S	36	S	38	S	20	S	34	S	34	S
inter2x055	Conventional	S. simulans	neg	≤0.25	S	≤0.5	S	≤0.12	I	neg	>4	R	>2*	R	1	S	≤0.12	S	1	S	≤0.5	S	≤1	S	≤0.12	S	≤8	S	≤0.5	S	≤0.03	S	≤10	S	27	S	23	S	27	S	20	S	25	S	30	S
inter2x056	Conventional	S. haemolyticus	neg	≤0.25	S	≤0.5	S	1	I	neg	0.5	S	>2	R	2	S	0.25	S	8	R	1	S	≤1	S	≤0.12	S	>64	R	≤0.5	S	≤0.03	S	≤10	S	21	S	9	R	10	R	18	S	22	S	20	R
inter2x057	Conventional	S. haemolyticus	neg	≤0.25	S	≤0.5	S	≤0.12	I	neg	0.5	S	>2	R	1	S	0.25	S	4	S	≤0.5	S	≤1	S	≤0.12	S	32	S	≤0.5	S	≤0.03	S	≤10	S	22	S	25	S	26	S	18	S	21	S	32	S
inter2x058	Conventional	S. simulans	neg	≤0.25	S	≤0.5	S	≤0.12	I	neg	≤0.25	S	0.25	S	2	S	≤0.12	S	1	S	≤0.5	S	>8	R	≤0.12	S	≤8	S	≤0.5	S	≤0.03	S	≤10	S	22	S	27	S	27	S	23	S	26	S	34	S
inter2x059	Conventional	S. simulans	neg	≤0.25	S	≤0.5	S	≤0.12	I	neg	≤0.25	S	≤0.12	S	1	S	≤0.12	S	≤ 0.5	S	≤0.5	S	>8	R	≤0.12	S	≤8	S	≤0.5	S	≤0.03	S	≤10	S	21	S	26	S	28	S	17	S	22	S	32	S
inter2x060	Conventional	S. simulans	neg	≤0.25	S	≤0.5	S	≤0.12	I	neg	≤0.25	S	0.25	S	1	S	≤0.12	S	1	S	≤0.5	S	>8	R	≤0.12	S	≤8	S	≤0.5	S	≤0.03	S	≤10	S	25	S	26	S	29	S	19	S	27	S	31	S
inter2x061	Conventional	S. simulans	neg	≤0.25	S	≤0.5	S	≤0.12	I	neg	≤0.25	S	≤0.12	S	1	S	≤0.12	S	≤ 0.5	S	≤0.5	S	≤1	S	≤0.12	S	≤8	S	≤0.5	S	≤0.03	S	≤10	S	24	S	27	S	29	S	19	S	24	S	32	S
inter2x062	Conventional	S. haemolyticus	neg	≤0.25	S	≤0.5	S	≤0.12	I	neg	>4	R	>2	R	1	S	≤0.12	S	1	S	≤0.5	S	>8	R	≤0.12	S	>64	R	≤0.5	S	≤0.03	S	≤10	S	24	S	10	R	10	R	20	S	21	S	29	S
inter2x063	Conventional	S. simulans	neg	≤0.25	S	≤0.5	S	≤0.12	I	neg	≤0.25	S	≤0.12	S	1	S	≤0.12	S	≤ 0.5	S	≤0.5	S	>8	R	≤0.12	S	≤8	S	≤0.5	S	≤0.03	S	≤10	S	24	S	26	S	28	S	18	S	26	S	29	S
inter2x064	Conventional	S. epidermidis	neg	≤0.25	S	≤0.5	S	≤0.12	I	neg	0.5	S	0.25	S	1	S	0.25	S	4	S	1	S	≤1	S	≤0.12	S	≤8	S	≤0.5	S	≤0.03	S	≤10	S	21	S	25	S	26	S	22	S	27	S	32	S
inter2x065	Conventional	S. simulans	neg	≤0.25	S	≤0.5	S	≤0.12	I	neg	≤0.25	S	0.25	S	1	S	≤0.12	S	≤ 0.5	S	≤0.5	S	≤1	S	≤0.12	S	≤8	S	≤0.5	S	≤0.03	S	≤10	S	21	S	23	S	25	S	20	S	25	S	30	S
inter2x067	Conventional	S. piscifermentans	neg	≤0.25	S	≤0.5	S	≤0.12	I	neg	>4	R	>2	R	1	S	0.25	S	1	S	≤0.5	S	>8	R	0.5	S	≤8	R	≤0.5	S	≤0.03	S	≤10	S	22	S	9	R	25	S	18	S	23	S	32	S
inter2x068	Conventional	S. piscifermentans	neg	≤0.25	S	≤0.5	S	≤0.12	I	neg	>4	R	>2	R	1	S	0.25	S	1	S	≤0.5	S	>8	R	0.5	S	≤8	R	≤0.5	S	≤0.03	S	≤10	S	18	S	24	S	28	S	19	S	24	S	34	S
inter2x069	Conventional	S. simulans	neg	≤0.25	S	≤0.5	S	≤0.12	I	pos	>4	R	0.25	R	1	S	≤0.12	S	1	S	≤0.5	S	≤1	S	≤0.12	S	≤8	S	≤0.5	S	≤0.03	S	≤10	S	18	S	26	S	26	S	0	R	25	S	32	S
inter2x071	Conventional	S. simulans	neg	≤0.25	S	≤0.5	S	≤0.12	I	pos	>4	R	0.25	R	1	S	0.25	S	1	S	≤0.5	S	>8	R	≤0.12	S	≤8	R	≤0.5	S	≤0.03	S	≤10	S	18	S	26	S	29	S	0	R	29	S	34	S
inter2x072	Conventional	S. simulans	neg	≤0.25	S	≤0.5	S	≤0.12	I	neg	≤0.25	S	0.25	S	1	S	≤0.12	S	1	S	≤0.5	S	≤1	S	≤0.12	S	≤8	S	≤0.5	S	≤0.03	S	≤10	S	22	S	26	S	26	S	20	S	27	S	35	S
inter2x073	Conventional	S. simulans	neg	≤0.25	S	≤0.5	S	≤0.12	I	neg	>4	R	>2*	R	1	S	0.25	S	1	S	≤0.5	S	>8	R	≤0.12	S	≤8	S	≤0.5	S	≤0.03	S	≤10	S	28	S	24	S	26	S	22	S	28	S	34	S
inter2x074	Conventional	S. simulans	neg	≤0.25	S	≤0.5	S	≤0.12	I	neg	≤0.25	S	0.25	S	1	S	≤0.12	S	1	S	≤0.5	S	≤1	S	≤0.12	S	≤8	S	≤0.5	S	≤0.03	S	≤10	S	21	S	25	S	29	S	19	S	26	S	32	S
inter2x075	Conventional	S. simulans	neg	≤0.25	S	≤0.5	S	≤0.12	I	neg	>4	R	>2*	R	1	S	≤0.12	S	≤ 0.5	S	≤0.5	S	>8	R	0.5	S	≤8	S	≤0.5	S	≤0.03	S	≤10	S	26	S	23	S	27	S	19	S	25	S	30	S
inter2x078	Conventional	S. simulans	neg	≤0.25	S	≤0.5	S	≤0.12	I	neg	≤0.25	S	0.25	S	1	S	≤0.12	S	≤ 0.5	S	≤0.5	S	≤1	S	≤0.12	S	≤8	S	≤0.5	S	≤0.03	S	≤10	S	20	S	11	R	27	S	18	S	24	S	29	S
inter2x079	Conventional	S. haemolyticus	neg	≤0.25	S	≤0.5	S	0.5	I	neg	0.5	S	1	R	2	S	0.25	S	1	S	≤0.5	S	2	R	≤0.12	S	≤8	S	≤0.5	S	≤0.03	S	≤10	S	18	S	24	S	25	S	20	S	24	S	26	S
inter2x080	Conventional	S. haemolyticus	neg	≤0.25	S	≤0.5	S	0.5	I	neg	0.5	S	1	R	2	S	0.25	S	1	S	≤0.5	S	≤1	S	≤0.12	S	≤8	S	≤0.5	S	≤0.03	S	≤10	S	22	S	24	S	25	S	21	S	24	S	25	S
inter2x081	Conventional	S. chromogenes	neg	≤0.25	S	≤0.5	S	≤0.12	I	neg	1	S	0.25	S	2	S	≤0.12	S	1	S	≤0.5	S	>8*	R	0.25	S	≤8	S	≤0.5	S	≤0.03	S	80	R	25	S	26	S	26	S	20	S	28	S	30	S
inter2x082	Conventional	S. piscifermentans	neg	≤0.25	S	≤0.5	S	≤0.12	I	neg	0.5	S	0.25	S	1	S	≤0.12	S	1	S	≤0.5	S	>8	R	0.5	S	≤8	R	≤0.5	S	≤0.03	S	≤10	S	21	S	27	S	30	S	21	S	28	S	32	S
inter2x083	Conventional	S. epidermidis	neg	≤0.25	S	≤0.5	S	≤0.12	I	neg	0.5	S	0.25	S	1	S	0.5	S	4	S	1	S	>8	R	≤0.12	S	≤8	S	≤0.5	S	≤0.03	S	80	R	21	S	26	S	26	S	20	S	27	S	32	S
inter2x084	Conventional	S. chromogenes	neg	≤0.25	S	≤0.5	S	≤0.12	I	neg	0.5	S	≤0.12	S	1	S	≤0.12	S	1	S	≤0.5	S	≤1	S	≤0.12	S	≤8	S	≤0.5	S	≤0.03	S	≤10	S	26	S	27	S	29	S	22	S	30	S	34	S
inter2x086	Conventional	S. chromogenes	neg	≤0.25	S	≤0.5	S	≤0.12	I	neg	0.5	S	≤0.12	S	1	S	≤0.12	S	1	S	≤0.5	S	≤1	S	≤0.12	S	≤8	S	≤0.5	S	≤0.03	S	≤10	S	28	S	28	S	30	S	24	S	31	S	36	S
inter2x087	Conventional	S. simulans	neg	≤0.25	S	≤0.5	S	≤0.12	I	neg	>4	R	>2*	R	1	S	≤0.12	S	1	S	≤0.5	S	≤1	S	≤0.12	S	≤8	S	≤0.5	S	≤0.03	S	≤10	S	28	S	25	S	28	S	23	S	30	S	34	S
inter2x088	Conventional	S. simulans	neg	≤0.25	S	≤0.5	S	≤0.12	I	neg	>4	R	>2*	R	1	S	≤0.12	S	1	S	≤0.5	S	>8	R	0.25	S	≤8	S	≤0.5	S	≤0.03	S	≤10	S	22	S	24	S	28	S	0	R	25	S	32	S
inter2x355	Conventional	S. piscifermentans	neg	≤ 0.25	S	≤0.5	S	≤ 0.12	I	neg	≥8	R	≥4	R	1	S	0.25	S	≤0.5	S	≤ 0.5	S	≥16	R	0.5	S	≤8	R	≤ 0.5	S	≤0.03	S	≤10	S	25	S	10	R	31	S	0	R	27	S	35	S
inter2x089	Conventional	S. haemolyticus	neg	≤0.25	S	≤0.5	S	≤0.12	I	neg	≥8	R	≥4	R	1	S	≤0.12	S	8	R	≤0.5	S	≥16	R	≤0.12	S	≥128	R	≤0.5	S	≤0.03	S	≤10	S	26	S	26	S	26	S	20	S	29	S	32	S
inter2x090	Conventional	S. simulans	neg	≤0.25	S	≤0.5	S	≤0.12	I	neg	>4	R	>2*	R	1	S	≤0.12	S	≤ 0.5	S	≤0.5	S	>8	R	0.25	S	≤8	S	≤0.5	S	≤0.03	S	160	R	21	S	21	S	24	S	21	S	22	S	32	S
inter2x091	Conventional	S. haemolyticus	neg	≤0.25	S	≤0.5	S	≤0.12	I	neg	≥8	R	≥4	R	1	S	≤0.12	S	8	R	≤0.5	S	≥16	R	≤0.12	S	≥128	R	≤0.5	S	≤0.03	S	10	S	26	S	25	S	29	S	22	S	20	S	31	S
inter2x092	Conventional	S. hominis	neg	≤0.25	S	≤0.5	S	≤0.12	I	neg	0.5*	R	>2	R	2	S	0.25	S	2	S	1	S	>8	R	≤0.12	S	>64	R	≤0.5	S	≤0.03	S	20	S	25	S	27	S	28	S	21	S	22	S	32	S
inter2x093	Conventional	S. pasteuri	pos	≥4	R	≤0.5	S	0.5	I	neg	≥8	R	≥4	R	2	S	0.25	S	1	S	1	S	≤1	S	≤0.12	S	64	R	≤0.5	R	≤0.03	S	≤10	S	24	S	22	S	25	S	21	S	22	S	28	S
inter2x102	Conventional	S. simulans	neg	≤0.25	S	≤0.5	S	≤0.12	I	neg	≤0.25	S	0.25	S	2	S	≤0.12	S	≤0.5	S	≤0.5	S	≤1	S	≤0.12	S	≤8	R	≤0.5	S	≤0.03	S	≤10	S	21	S	10	R	28	S	21	S	27	S	34	S
inter2x103	Conventional	S. epidermidis	neg	≤0.25	S	≤0.5	S	≤0.12	I	neg	≥8	R	≥4	R	1	S	0.5	S	4	S	1	S	≥16	R	≤0.12	S	≤8	R	≤0.5	S	≤0.03	S	20	S	22	S	22	S	24	S	19	S	24	S	29	S
inter2x104	Conventional	S. simulans	neg	≤0.25	S	≤0.5	S	≤0.12	I	neg	≤0.25	S	0.25	S	1	S	≤0.12	S	≤0.5	S	≤0.5	S	≤1	S	≤0.12	S	≤8	R	≤0.5	S	≤0.03	S	≤10	S	22	S	26	S	28	S	21	S	26	S	29	S
inter2x105	Conventional	S. simulans	neg	≤0.25	S	≤0.5	S	≤0.12	I	neg	≤0.25	S	≤0.12	S	1	S	≤0.12	S	≤0.5	S	≤0.5	S	≥16	R	≤0.12	S	≤8	R	≤0.5	S	≤0.03	S	80	R	23	S	27	S	27	S	21	S	26	S	32	S
inter2x107	Conventional	S. cohnii	neg	0.5	S	≤0.5	S	0.5	I	neg	4	R	0.5	R	≥8	S	0.25	S	1	S	1	S	≥16	R	0.25	S	≤8	R	8	R	0.12	I	≤10	S	29	S	25	S	24	S	0	R	23	S	28	S
inter2x108	Conventional	S. simulans	neg	≤0.25	S	≤0.5	S	0.5	I	neg	≥8	R	≥4	R	1	S	≤0.12	S	1	S	≤0.5	S	≥16	R	≤0.12	S	≤8	R	≤0.5	S	≤0.03	S	≤10	S	23	S	24	S	27	S	0	R	28	S	26	S
inter2x110	Conventional	S. cohnii	neg	0.5	S	≤0.5	S	0.25	I	neg	≥8	R	≥4	R	2	S	≤0.12	S	1	S	≤0.5	S	≥16	R	≤0.12	S	≤8	R	16	R	0.12	I	≤10	S	28	S	8	R	8	R	0	R	17	R	28	S
inter2x111	Conventional	S. warneri	neg	≤0.25	S	≤0.5	S	0.5	I	neg	≤0.25	S	0.25	S	2	S	0.25	S	1	S	≤0.5	S	2	R	≤0.12	S	≥128	R	≤0.5	R	≤0.03	S	≤10	S	22	S	28	S	29	S	22	S	26	S	25	S
inter2x114	Conventional	S. epidermidis	neg	≤0.25	S	≤0.5	S	≤0.12	I	neg	1	S	0.5	R	2	S	0.5	S	4	S	2	S	≥16	R	1	R	≤8	S	≤0.5	S	≤0.03	S	≤10	S	24	S	25	S	30	S	21	S	30	S	32	S
inter2x115	Conventional	S. muscae	neg	≤0.25	S	≤0.5	S	≤0.12	I	neg	1	S	0.5	R	4	S	≤0.12	S	1	S	≤0.5	S	≥16	R	≤0.12	S	≤8	R	≤0.5	S	≤0.03	S	≤10	S	36	S	36	S	38	S	34	S	27	S	40	S
inter2x116	Conventional	S. epidermidis	neg	≤0.25	S	≤0.5	S	≤0.12	I	neg	0.5	S	0.5	R	1	S	0.25	S	2	S	1	S	≤1	S	≤0.12	S	≤8	S	≤0.5	S	≤0.03	S	≤10	S	21	S	23	S	26	S	20	S	26	S	30	S
inter2x117	Conventional	S. haemolyticus	neg	≤0.25	S	≤0.5	S	≤0.12	I	neg	0.5	S	0.25	S	1	S	0.25	S	1	S	≤0.5	S	≤1	S	≤0.12	S	64	R	≤0.5	S	≤0.03	S	≤10	S	22	S	24	S	27	S	19	S	25	S	27	S
inter2x118	Conventional	S. simulans	neg	≤0.25	S	≤0.5	S	≤0.12	I	neg	≤0.25	S	≤0.12	S	1	S	≤0.12	S	1	S	≤0.5	S	≤1	S	≤0.12	S	≤8	S	≤0.5	S	≤0.03	S	≤10	S	23	S	29	S	30	S	23	S	28	S	32	S
inter2x119	Conventional	S. simulans	neg	≤0.25	S	≤0.5	S	≤0.12	I	neg	≤0.25	S	0.25	S	1	S	≤0.12	S	1	S	≤0.5	S	≤1	S	≤0.12	S	≤8	S	≤0.5	S	≤0.03	S	≤10	S	30	S	32	S	32	S	28	S	30	S	40	S
inter2x121	Conventional	S. warneri	pos	≥4	R	≤0.5	S	≤0.12	I	neg	0.5	S	≤0.12	S	2	S	0.5	S	1	S	≤0.5	S	≥16	R	≤0.12	S	>128	R	≤0.5	R	≤0.03	S	20	S	19	S	23	S	24	S	20	S	23	S	28	S
inter2x122	Conventional	S. epidermidis	neg	≤0.25	S	≤0.5	S	≤0.12	I	neg	0.5	S	0.25	S	2	S	0.5	S	4	S	1	S	≥16	R	≤0.12	S	≤8	S	≤0.5	S	≤0.03	S	≤10	S	21	S	23	S	26	S	21	S	26	S	31	S
inter2x123	Conventional	S. epidermidis	neg	≤0.25	S	≤0.5	S	≤0.12	I	neg	0.5	S	0.5	R	1	S	0.25	S	4	S	≤0.5	S	≤1	S	≤0.12	S	≤8	S	≤0.5	S	≤0.03	S	20	S	22	S	24	S	25	S	21	S	27	S	30	S
inter2x125	Conventional	S. epidermidis	neg	≤0.25	S	≤0.5	S	≤0.12	I	neg	0.5	S	≤0.12	S	1	S	0.5	S	4	S	1	S	≤0.12	S	≤0.12	S	≤8	S	≤0.5	S	≤0.03	S	≤10	S	23	S	23	S	25	S	20	S	25	S	32	S
inter2x128	Conventional	S. hominis	pos	≥4	R	≤0.5	S	0.5	I	neg	0.5	S	0.25	S	4	S	0.25	S	2	S	1	S	≥16	R	≤0.12	S	>128	R	≤0.5	S	≤0.03	S	≤10	S	27	S	24	S	25	S	17	S	24	S	24	S
inter2x129	Conventional	S. warneri	neg	≤0.25	S	≤0.5	S	≤0.12	I	neg	0.5	S	≤0.12	S	1	S	0.5	S	1	S	≤0.5	S	≥16	R	≤0.12	S	>128	R	≤0.5	S	≤0.03	S	≤10	S	22	S	24	S	26	S	19	S	23	S	32	S
inter2x130	Conventional	S. warneri	neg	≤0.25	S	≤0.5	S	≤0.12	I	neg	0.5	S	≤0.12	S	1	S	0.5	S	1	S	≤0.5	S	≥16	R	≤0.12	S	>128	R	≤0.5	S	≤0.03	S	≤10	S	24	S	23	S	24	S	20	S	24	S	30	S
inter2x131	Conventional	S. pasteuri	pos	≥4	R	≤0.5	S	0.25	I	neg	≥8	R	≥4	R	1	S	0.25	S	1	S	≤0.5	S	≥16	R	≤0.12	S	>128	R	≤0.5	R	≤0.03	S	20	S	25	S	25	S	24	S	0	R	24	S	28	S
inter2x133	Conventional	S. epidermidis	neg	≤0.25	S	≤0.5	S	≤0.12	I	neg	≤0.25	S	≤0.12	S	1	S	0.5	S	2	S	1	S	≥16	R	≤0.12	S	≤8	S	≤0.5	S	≤0.03	S	≤10	S	22	S	27	S	28	S	0	R	26	S	34	S
inter2x137	Conventional	S. simulans	neg	≤0.25	S	≤0.5	S	≤0.12	I	neg	≤0.25	S	0.25	S	2	S	≤0.12	S	1	S	≤0.5	S	≤1	S	≤0.12	S	≤8	S	≤0.5	S	≤0.03	S	≤10	S	26	S	25	S	28	S	18	S	26	S	33	S
inter2x138	Conventional	S. simulans	neg	≤0.25	S	≤0.5	S	≤0.12	I	neg	≤0.25	S	0.25	S	2	S	≤0.12	S	1	S	≤0.5	S	≥16	R	0.25	S	≤8	S	≤0.5	S	≤0.03	S	≤10	S	22	S	11	R	25	S	19	S	25	S	30	S
inter2x139	Conventional	S. pasteuri	neg	0.5	S	≤0.5	S	≤0.12	I	neg	≥8	R	≥4	R	1	S	0.25	S	1	S	≤0.5	S	≤1	S	≤0.12	S	>128	R	≤0.5	R	≤0.03	S	≤10	S	22	S	23	S	26	S	18	S	25	S	32	S
inter2x141	Conventional	S. cohnii	neg	2	S	≤0.5	S	0.25	I	pos	≥8	R	0.5	R	2	S	≤0.12	S	1	S	≤0.5	S	≤1	S	≤0.12	S	≤8	S	16	R	0.5*	I	≤10	S	29	S	27	S	26	S	18	S	24	S	29	S
inter2x142	Conventional	S. simulans	neg	≤0.25	S	≤0.5	S	≤0.12	I	neg	≥8	R	≥4*	R	1	S	≤0.12	S	≤0.5	S	≤0.5	S	≥16	R	0.5	S	≤8	S	≤0.5	S	≤0.03	S	≤10	S	24	S	22	S	22	S	19	S	26	S	29	S
inter2x144	Conventional	S. simulans	neg	≤0.25	S	≤0.5	S	≤0.12	I	neg	≥8	R	≥4*	R	1	S	≤0.12	S	1	S	≤0.5	S	≥16	R	≤0.12	S	≤8	S	≤0.5	S	≤0.03	S	≤10	S	22	S	22	S	24	S	0	R	24	S	30	S
inter2x145	Conventional	S. simulans	neg	≤0.25	S	≤0.5	S	≤0.12	I	neg	≥8	R	≥4*	R	2	S	≤0.12	S	1	S	≤0.5	S	≥16	R	≤0.12	S	≤8	S	≤0.5	S	≤0.03	S	≤10	S	24	S	24	S	24	S	18	S	26	S	27	S
inter2x146	Conventional	S. simulans	neg	≤0.25	S	≤0.5	S	≤0.12	I	neg	≥8	R	≥4*	R	1	S	≤0.12	S	1	S	≤0.5	S	≥16	R	≤0.12	S	≤8	S	≤0.5	S	≤0.03	S	≤10	S	20	S	23	S	25	S	10	I	27	S	30	S
inter2x147	Conventional	S. simulans	neg	≤0.25	S	≤0.5	S	≤0.12	I	neg	≥8	R	≥4*	R	1	S	≤0.12	S	1	S	≤0.5	S	≥16	R	≤0.12	S	≤8	S	≤0.5	S	≤0.03	S	≤10	S	20	S	22	S	25	S	9	I	27	S	31	S
inter2x148	Conventional	S. simulans	neg	≤0.25	S	≤0.5	S	≤0.12	I	neg	≥8	R	≥4*	R	2	S	≤0.12	S	1	S	≤0.5	S	≥16	R	≤0.12	S	≤8	S	≤0.5	S	≤0.03	S	≤10	S	22	S	22	S	26	S	18	S	26	S	27	S
inter2x150	Conventional	S. simulans	neg	≤0.25	S	≤0.5	S	≤0.12	I	neg	≥8	R	≥4*	R	1	S	≤0.12	S	1	S	≤0.5	S	≤1	S	≤0.12	S	≤8	S	≤0.5	S	≤0.03	S	≤10	S	21	S	21	S	22	S	14	S	21	S	26	S
inter2x151	Conventional	S. simulans	neg	≤0.25	S	≤0.5	S	≤0.12	I	neg	≥8	R	≥4*	R	1	S	≤0.12	S	≤0.5	S	≤0.5	S	≥16	R	≤0.12	S	≤8	S	≤0.5	S	≤0.03	S	≤10	S	21	S	25	S	26	S	0	R	26	S	32	S
inter2x152	Conventional	S. simulans	neg	≤0.25	S	≤0.5	S	≤0.12	I	neg	≥8	R	≥4*	R	1	S	0.25	S	1	S	≤0.5	S	≥16	R	≤0.12	S	≤8	S	≤0.5	S	≤0.03	S	≤10	S	26	S	22	S	26	S	20	S	26	S	32	S
inter2x094	Conventional	S. simulans	neg	≤0.25	S	≤0.5	S	≤0.12	I	neg	>4	R	>2*	R	2	S	≤0.12	S	1	S	≤0.5	S	>8	R	≤0.12	S	≤8	S	≤0.5	S	≤0.03	S	≤10	S	34	S	32	S	34	S	28	S	27	S	38	S
inter2x096	Conventional	S. haemolyticus	pos	>2	R	≤0.5	S	1	I	neg	>4	R	>2	R	≤ 0.5	S	≤0.12	S	1	S	≤0.5	S	≤1	S	≤0.12	S	>64	R	≤0.5	S	≤0.03	S	≤10	S	30	S	25	S	27	S	23	S	23	S	21	R
inter2x098	Conventional	S. haemolyticus	pos	≥4	R	≤0.5	S	0.5	I	neg	≥8	R	≥4	R	≤ 0.5	S	≤0.12	S	1	S	≤0.5	S	≥16	R	≤0.12	S	≥128	R	≤0.5	S	≤0.03	S	80	R	26	S	25	S	27	S	22	S	22	S	22	R
inter2x099	Conventional	S. chromogenes	neg	≤0.25	S	≤0.5	S	≤0.12	I	neg	≥8	R	≥4	R	1	S	0.25	S	1	S	≤0.5	S	≥16	R	0.25	S	≤8	S	≤0.5	S	≤0.03	S	≤10	S	25	S	28	S	28	S	23	S	27	S	36	S
inter2x100	Conventional	S. simulans	neg	≤0.25	S	≤0.5	S	≤0.12	I	neg	≥8	R	≥4*	R	1	S	≤0.12	S	1	S	≤0.5	S	≤1	S	≤0.12	S	≤8	S	≤0.5	S	≤0.03	S	≤10	S	21	S	24	S	26	S	17	S	26	S	32	S
inter2x101	Conventional	S. haemolyticus	neg	≤0.25	S	≤0.5	S	1	I	neg	≥8	R	≥4	R	≤ 0.5	S	≤0.12	S	1	S	≤0.5	S	≤1	S	≤0.12	S	≥128	R	≤0.5	R	≤0.03	S	≤10	S	30	S	26	S	29	S	25	S	24	S	24	S
inter2x309	Conventional	S. simulans	neg	≤ 0.25	S	4	R	2	R	neg	≤0.25	S	> 2	R	2	S	≤0.12	S	≤ 0.5	S	≤ 0.5	S	≤ 1	S	≤0.12	S	≤8	S	≤ 0.5	S	≤0.03	S	≤10	S	18	S	27	S	28	S	0	R	22	S	22	R
inter2x310	Conventional	S. simulans	neg	≤ 0.25	S	≤0.5	S	≤ 0.12	I	neg	≤0.25	S	> 2*	R	1	S	≤0.12	S	1	S	≤ 0.5	S	≤ 1	S	≤0.12	S	≤8	S	≤ 0.5	S	≤0.03	S	≤10	S	21	S	23	S	25	S	18	S	23	S	33	S
inter2x311	Conventional	S. haemolyticus	neg	≤ 0.25	S	≤0.5	S	0.5	I	neg	0.5	S	> 2	R	2	S	0.25	S	2	S	≤ 0.5	S	>8	R	≤0.12	S	64	R	≤ 0.5	S	≤0.03	S	≤10	S	25	S	26	S	28	S	0	R	23	S	24	S
inter2x312	Conventional	S. haemolyticus	neg	≤ 0.25	S	≤0.5	S	0.5	I	neg	0.5	S	1	R	1	S	0.25	S	1	S	≤ 0.5	S	>8	R	0.25	S	≤8	S	≤ 0.5	S	≤0.03	S	80	R	24	S	27	S	28	S	0	R	25	S	30	S
inter2x313	Conventional	S. simulans	neg	≤ 0.25	S	≤0.5	S	≤ 0.12	I	neg	≤0.25	S	> 2*	R	2	S	≤0.12	S	1	S	≤ 0.5	S	>8	R	≤0.12	S	≤8	S	≤ 0.5	S	≤0.03	S	≤10	S	24	S	23	S	25	S	0	R	23	S	30	S
inter2x314	Conventional	S. haemolyticus	neg	≤ 0.25	S	≤0.5	S	≤ 0.12	I	neg	0.5	S	> 2	R	1	S	≤0.12	S	8	R	≤ 0.5	S	≤ 1	S	≤0.12	S	>64	R	≤ 0.5	S	≤0.03	S	20	S	27	S	25	S	26	S	0	R	21	S	28	S
inter2x379	Conventional	S. simulans	neg	≤ 0.25	S	≤0.5	S	≤ 0.12	I	neg	≤0.25	S	0.25	S	2	S	≤0.12	S	1	S	≤ 0.5	S	≥16	R	≤0.12	S	≤8	S	≤ 0.5	S	≤0.03	S	≤10	S	29	S	25	S	28	S	22	S	30	S	38	S
inter2x380	Conventional	S. simulans	neg	≤ 0.25	S	≤0.5	S	≤ 0.12	I	neg	≤0.25	S	0.25	S	1	S	≤0.12	S	1	S	≤ 0.5	S	≤1	S	≤0.12	S	≤8	S	≤ 0.5	S	≤0.03	S	≤10	S	24	S	26	S	26	S	20	S	28	S	36	S
inter2x316	Conventional	S. hominis	neg	≤ 0.25	S	≤0.5	S	≤ 0.12	I	neg	0.5	S	≤ 0.12	S	2	S	0.25	S	2	S	1	S	>8	R	≤0.12	S	>64	R	≤ 0.5	S	≤0.03	S	≤10	S	25	S	27	S	30	S	22	S	27	S	30	S
inter2x317	Conventional	S. haemolyticus	neg	≤ 0.25	S	≤0.5	S	≤ 0.12	I	neg	1	S	0.25	S	2	S	0.25	S	8	R	1	S	≤ 1	S	≤0.12	S	>64	R	≤ 0.5	S	≤0.03	S	≤10	S	24	S	22	S	23	S	18	S	23	S	27	S
inter2x318	Conventional	S. chromogenes	neg	≤ 0.25	S	≤0.5	S	≤ 0.12	I	neg	1	S	1*	R	2	S	0.25	S	1	S	≤ 0.5	S	≤ 1	S	≤0.12	S	≤8	S	≤ 0.5	S	≤0.03	S	≤10	S	23	S	26	S	29	S	19	S	24	S	31	S
inter2x319	Conventional	S. cohnii	pos	>2	R	≤0.5	S	0.5	I	neg	>4	R	>2	R	2	S	0.25	S	2	S	1	S	>8	R	≤0.12	S	≤8	S	8	R	0.12	I	20	S	27	S	9	R	9	R	21	S	20	S	27	S
inter2x320	Conventional	S. xylosus	neg	0.5	S	≤0.5	S	0.5	I	neg	1	S	0.5	S	2	S	0.25	S	1	S	≤ 0.5	S	≤ 1	S	≤0.12	S	≤8	S	8	R	≤0.03	S	≤10	S	29	S	26	S	28	S	19	S	24	S	30	S
inter2x321	Conventional	S. cohnii	neg	0.5	R	≤0.5	S	2	R	neg	>4	R	>2	R	4	S	0.25	S	2	S	1	S	>8	R	0.25	S	≤8	S	4	R	0.12	I	≤10	S	33	S	8	R	8	R	0	R	18	S	30	S
inter2x323	Conventional	S. simulans	neg	≤ 0.25	S	≤0.5	S	≤ 0.12	I	neg	≤0.25	S	>2*	R	1	S	≤0.12	S	≤0.5	S	≤ 0.5	S	>8	R	0.25	S	≤8	S	≤ 0.5	S	≤0.03	S	≤10	S	20	S	23	S	24	S	18	S	22	S	30	S
inter2x324	Conventional	S. haemolyticus	neg	≤ 0.25	S	≤0.5	S	≤ 0.12	I	neg	0.5	S	1	R	1	S	≤0.12	S	1	S	≤ 0.5	S	>8	R	0.25	S	64	R	≤ 0.5	S	≤0.03	S	≤10	S	25	S	25	S	27	S	22	S	22	S	26	S
inter2x325	Conventional	S. pasteuri	pos	>2	R	≤0.5	S	≤ 0.12	I	neg	≤0.25	S	≤ 0.12	S	2	S	0.5	S	1	S	≤ 0.5	S	>8	R	≤0.12	S	>64	R	≤ 0.5	R	≤0.03	S	80	R	22	S	24	S	25	S	23	S	26	S	28	S
inter2x326	Conventional	S. pasteuri	neg	0.5	S	≤0.5	S	≤ 0.12	I	neg	≤0.25	S	≤ 0.12	S	2	S	0.25	S	≤0.5	S	≤ 0.5	S	>8	R	≤0.12	S	>64	R	≤ 0.5	R	≤0.03	S	≤10	S	23	S	24	S	25	S	20	S	25	S	32	S
inter2x327	Conventional	S. simulans	neg	≤ 0.25	S	≤0.5	S	≤ 0.12	I	neg	>4	R	>2*	R	1	S	≤0.12	S	1	S	≤ 0.5	S	≤1	S	≤0.12	S	≤8	S	≤ 0.5	S	≤0.03	S	≤10	S	32	S	27	S	30	S	0	R	26	S	36	S
inter2x328	Conventional	S. simulans	neg	≤ 0.25	S	≤0.5	S	≤ 0.12	I	neg	>4	R	>2*	R	1	S	≤0.12	S	1	S	≤ 0.5	S	≤1	S	≤0.12	S	≤8	S	≤ 0.5	S	≤0.03	S	≤10	S	23	S	22	S	25	S	0	R	26	S	29	S
inter2x329	Conventional	S. simulans	neg	≤ 0.25	S	≤0.5	S	≤ 0.12	I	neg	>4	R	>2*	R	1	S	≤0.12	S	≤0.5	S	≤ 0.5	S	>8	R	0.5	S	≤8	S	≤ 0.5	S	≤0.03	S	≤10	S	27	S	23	S	26	S	21	S	22	S	29	S
inter2x330	Conventional	S. simulans	neg	≤ 0.25	S	≤0.5	S	≤ 0.12	I	neg	≤0.25	S	0.25	S	2	S	≤0.12	S	≤0.5	S	≤ 0.5	S	2	I	≤0.12	S	≤8	S	≤ 0.5	S	≤0.03	S	≤10	S	27	S	27	S	28	S	20	S	29	S	28	S
inter2x331	Conventional	S. simulans	neg	≤ 0.25	S	≤0.5	S	≤ 0.12	I	neg	≤0.25	S	0.25	S	2	S	≤0.12	S	≤0.5	S	≤ 0.5	S	≤1	S	≤0.12	S	≤8	S	≤ 0.5	S	≤0.03	S	≤10	S	28	S	25	S	28	S	25	S	28	S	34	S
inter2x332	Conventional	S. simulans	neg	≤ 0.25	S	≤0.5	S	≤ 0.12	I	neg	≤0.25	S	0.25	S	2	S	≤0.12	S	≤0.5	S	≤ 0.5	S	≤1	S	≤0.12	S	≤8	S	≤ 0.5	S	≤0.03	S	≤10	S	26	S	24	S	25	S	20	S	25	S	29	S
inter2x333	Conventional	S. haemolyticus	neg	≤ 0.25	S	≤0.5	S	≤ 0.12	I	neg	0.5	S	≤ 0.12	S	1	S	0.25	S	1	S	≤ 0.5	S	≤1	S	≤0.12	S	64	R	≤ 0.5	S	≤0.03	S	≤10	S	23	S	24	S	25	S	19	S	24	S	26	S
inter2x334	Conventional	S. haemolyticus	neg	≤ 0.25	S	≤0.5	S	≤ 0.12	I	neg	0.5	S	≤ 0.12	S	2	S	0.25	S	2	S	≤ 0.5	S	≤1	S	≤0.12	S	64	R	≤ 0.5	S	≤0.03	S	≤10	S	21	S	23	S	24	S	19	S	25	S	25	S
inter2x335	Conventional	S. haemolyticus	neg	≤ 0.25	S	≤0.5	S	1	I	neg	0.5	S	≥4	R	2	S	0.5	S	2	S	≤ 0.5	S	≤1	S	≤0.12	S	≥128	R	≤ 0.5	S	≤0.03	S	≤10	S	23	S	24	S	24	S	20	S	23	S	20	R
inter2x381	Conventional	S. simulans	neg	≤ 0.25	S	≤0.5	S	≤ 0.12	I	neg	≤0.25	S	0.25	S	1	S	≤0.12	S	1	S	≤ 0.5	S	≤1	S	≤0.12	S	≤8	S	≤ 0.5	S	≤0.03	S	80	R	25	S	26	S	29	S	20	S	28	S	34	S
inter2x336	Conventional	S. haemolyticus	neg	≤ 0.25	S	≤0.5	S	0.5	I	neg	0.5	S	≥4	R	1	S	≤0.12	S	1	S	≤ 0.5	S	≤1	S	≤0.12	S	≤8	S	≤ 0.5	S	≤0.03	S	≤10	S	22	S	26	S	27	S	19	S	25	S	25	S
inter2x338	Conventional	S. chromogenes	neg	≤ 0.25	S	≤0.5	S	≤ 0.12	I	neg	0.5	S	≤ 0.12	S	2	S	0.25	S	2	S	≤ 0.5	S	≤1	S	≤0.12	S	≤8	S	≤ 0.5	S	≤0.03	S	≤10	S	29	S	32	S	36	S	24	S	30	S	38	S
inter2x339	Conventional	S. hominis	pos	≥4	R	≤0.5	S	1	I	neg	0.5	S	0.25	S	4	S	0.25	S	8	R	1	S	≥16	R	≤0.12	S	≥128	R	≤ 0.5	S	≤0.03	S	≤10	S	24	S	24	S	26	S	18	S	26	S	23	R
inter2x340	Conventional	S. simulans	neg	≤ 0.25	S	≤0.5	S	≤ 0.12	I	neg	≥8	R	≥4*	R	2	S	≤0.12	S	1	S	≤ 0.5	S	≥16	R	≤0.12	S	≤8	S	≤ 0.5	S	≤0.03	S	80	R	22	S	22	S	23	S	18	S	23	S	28	S
inter2x341	Conventional	S. pasteuri	pos	≥4	R	≤0.5	S	0.25	I	neg	≤0.25	S	≥4	R	2	S	0.25	S	1	S	≤ 0.5	S	≥16	R	0.25	S	≥128	R	≤ 0.5	S	≤0.03	S	≤10	S	20	S	23	S	26	S	18	S	20	S	27	S
inter2x382	Conventional	S. pasteuri	pos	≥4	R	≤0.5	S	≤ 0.12	I	neg	≥8	R	≥4	R	1	S	0.5	S	1	S	≤ 0.5	S	≥16	R	0.25	S	≥128*	R	≤ 0.5	R	≤0.03	S	20	S	20	S	21	S	23	S	20	S	21	S	29	S
inter2x342	Conventional	S. pasteuri	pos	≥4	R	≤0.5	S	0.25	I	neg	≤0.25	S	≥4	R	2	S	0.25	S	1	S	≤ 0.5	S	≥16	R	0.25	S	≥128	R	≤ 0.5	S	≤0.03	S	80	R	20	S	23	S	25	S	18	S	20	S	27	S
inter2x343	Conventional	S. pasteuri	pos	≥4	R	≤0.5	S	0.25	I	neg	≥8	R	≥4	R	2	S	0.25	S	1	S	≤ 0.5	S	≥16	R	≤0.12	S	≥128	R	≤ 0.5	R	≤0.03	S	≤10	S	22	S	20	S	23	S	19	S	25	S	26	S
inter2x344	Conventional	S. pasteuri	pos	≥4	R	≤0.5	S	≤ 0.12	I	neg	≤0.25	S	≥4	R	2	S	0.25	S	1	S	≤ 0.5	S	≥16	R	≤0.12	S	≥128	R	≤ 0.5	S	≤0.03	S	≤10	S	20	S	22	S	26	S	18	S	20	S	26	S
inter2x345	Conventional	S. pasteuri	pos	≥4	R	≤0.5	S	0.25	I	neg	≤0.25	S	≥4	R	2	S	0.25	S	1	S	≤ 0.5	S	≥16	R	≤0.12	S	≥128	R	≤ 0.5	S	≤0.03	S	≤10	S	18	S	22	S	23	S	17	S	21	S	25	S
inter2x350	Alternative	S. simulans	neg	≤ 0.25	S	≤0.5	S	≤ 0.12	I	neg	≤0.25	S	≤0.12	S	1	S	≤0.12	S	≤0.5	S	≤ 0.5	S	≤1	S	≤0.12	S	≤8	S	≤ 0.5	S	≤0.03	S	≤10	S	21	S	27	S	28	S	19	S	26	S	30	S
inter2x011	Alternative	S. simulans	neg	≤0.25	S	≤0.5	S	≤0.12	I	neg	≤0.25	S	>2*	R	1	S	≤0.12	s	1	s	≤0.5	S	>8	R	≤0.12	s	≤8	S	≤0.5	s	≤0.03	S	≤10	S	26	S	26	S	26	S	0	R	22	S	32	S
inter2x012	Alternative	S. cohnii	neg	2	R	≤0.5	S	0.5	I	neg	>4	R	0.5	I	2	S	0.25	s	2	s	1	S	≤1	s	≤0.12	s	≤8	S	8	R	1	R	≤10	S	28	S	26	S	28	S	20	S	22	S	32	S
inter2x014	Alternative	S. cohnii	neg	0.5	R	≤0.5	S	0.25	I	neg	>4	R	0.25	s	2	S	≤0.12	s	1	s	≤0.5	S	>8	R	≤0.12	s	≤8	S	8	R	0.5	I	≤10	S	32	S	8	R	9	R	21	S	27	S	36	S
inter2x017	Alternative	S. simulans	neg	≤0.25	S	≤0.5	S	≤0.12	I	neg	≤0.25	S	0.25	s	1	S	≤0.12	s	≤0.5	s	≤0.5	S	≤1	s	≤0.12	s	≤8	S	≤0.5	S	≤0.03	S	≤10	S	24	S	25	S	29	S	21	S	25	S	30	S
inter2x019	Alternative	S. simulans	neg	≤0.25	S	≤0.5	S	≤0.12	I	neg	≤0.25	S	>2*	R	1	S	≤0.12	s	≤0.5	s	≤0.5	S	8	R	≤0.12	s	≤8	S	≤0.5	S	≤0.03	S	≤10	S	25	S	25	S	28	S	0	R	22	S	30	S
inter2x020	Alternative	S. simulans	neg	≤0.25	S	≤0.5	S	≤0.12	I	neg	≤0.25	S	0.25	s	1	S	≤0.12	s	≤0.5	s	≤0.5	S	≤1	s	≤0.12	s	≤8	S	≤0.5	S	≤0.03	S	≤10	S	25	S	26	S	28	S	19	S	21	S	36	S
inter2x021	Alternative	S. saprophyticus	neg	2	S	≤0.5	S	1	I	neg	1	S	≤0.12	S	4	S	0.25	S	2	S	1	S	≥16	R	0.5	S	≥128	R	8	R	≤0.03	S	≤10	S	19	S	9	R	27	S	18	S	27	S	29	S
inter2x022	Alternative	S. simulans	neg	≤0.25	S	≤0.5	S	≤0.12	I	neg	>4	R	>2*	R	1	S	≤0.12	s	≤0.5	s	≤0.5	S	≤1	s	≤0.12	S	≤8	S	≤0.5	s	≤0.03	S	≤10	S	25	S	16	R	24	S	21	S	25	S	32	S
inter2x154	Alternative	S. arlettae	neg	2	S	≤0.5	S	0.5	I	neg	≥8	R	≥4	R	2	S	≤0.12	S	2	S	≤0.5	S	≥16	R	≤0.12	S	≥128	R	4	R	≤0.03	S	≤10	S	26	S	10	R	9	R	19	S	23	S	31	S
inter2x156	Alternative	S. cohnii	neg	2	S	≤0.5	S	0.25	I	neg	≥8	R	0.5	R	2	S	0.25	S	2	S	1	S	≤1	S	≤0.12	S	≤8	S	16	R	≤0.03	S	≤10	S	27	S	25	S	27	S	19	S	23	S	30	S
inter2x158	Alternative	S. cohnii	pos	0.5	R	≤0.5	S	0.25	I	neg	≥8	R	0.5	I	2	S	0.25	S	2	S	1	S	≤1	S	≤0.12	S	≤8	S	8	R	0.12	I	≤10	S	28	S	25	S	26	S	17	S	23	S	30	S
inter2x352	Alternative	S. simulans	neg	≤ 0.25	S	≤0.5	S	≤ 0.12	I	neg	≤0.25	S	0.5	I	1	S	≤0.12	S	1	S	≤ 0.5	S	≤1	S	≤0.12	S	≤8	S	≤ 0.5	S	≤0.03	S	≤10	S	21	S	25	S	27	S	19	S	26	S	32	S
inter2x353	Alternative	S. simulans	neg	≤ 0.25	S	≤0.5	S	≤ 0.12	I	neg	≤0.25	S	0.25	S	1	S	≤0.12	S	1	S	≤ 0.5	S	≤1	S	≤0.12	S	≤8	S	≤ 0.5	S	≤0.03	S	≤10	S	22	S	25	S	25	S	19	S	24	S	30	S
inter2x164	Alternative	S. simulans	neg	≤0.25	S	≤0.5	S	≤0.12	I	neg	≤0.25	S	0.25	S	1	S	≤0.12	S	1	S	≤0.5	S	≤1	S	≤0.12	S	≤8	S	≤0.5	S	≤0.03	S	≤10	S	24	S	26	S	28	S	20	S	27	S	32	S
inter2x166	Alternative	S. xylosus	neg	0.5	S	≤0.5	S	0.5	I	neg	1	S	0.5	R	2	S	0.5	S	1	S	1	S	2	R	≤0.12	S	32	R	8	R	0.12	I	≤10	S	21	S	26	S	25	S	17	S	22	S	27	S
inter2x167	Alternative	S. simulans	neg	≤0.25	S	≤0.5	S	0.5	I	neg	≤0.25	S	0.25	S	2	S	≤0.12	S	1	S	≤0.5	S	≤1	S	≤0.12	S	≤8	S	≤0.5	S	≤0.03	S	≤10	S	18	S	23	S	25	S	16	S	24	S	24	S
inter2x169	Alternative	S. chromogenes	neg	≤0.25	S	≤0.5	S	≤0.12	I	neg	1	S	≤0.12	S	2	S	0.25	S	1	S	≤0.5	S	≤1	S	≤0.12	S	≤8	S	≤0.5	S	≤0.03	S	≤10	S	29	S	30	S	32	S	24	S	30	S	40	S
inter2x170	Alternative	S. chromogenes	neg	≤0.25	S	≤0.5	S	≤0.12	I	neg	1	S	≤0.12	S	1	S	0.25	S	1	S	≤0.5	S	≤1	S	≤0.12	S	≤8	S	≤0.5	S	≤0.03	S	≤10	S	30	S	32	S	32	S	26	S	32	S	40	S
inter2x172	Alternative	S. chromogenes	neg	≤0.25	S	≤0.5	S	≤0.12	I	neg	0.5	S	≤0.12	S	1	S	0.25	S	1	S	≤0.5	S	≤1	S	≤0.12	S	≤8	S	≤0.5	S	≤0.03	S	≤10	S	32	S	36	S	36	S	26	S	30	S	40	S
inter2x186	Alternative	S. epidermidis	neg	≥4	R	≤0.5	S	≤0.12	I	neg	0.5	S	≥4	R	1	S	0.25	S	4	S	1	S	≥16	R	≤0.12	S	64	R	≤0.5	S	≤0.03	S	≤10	S	26	S	25	S	30	S	30	S	30	S	38	S
inter2x357	Alternative	S. warneri	neg	≤ 0.25	S	≤0.5	S	≤ 0.12	I	neg	≥8	R	≥4	R	1	S	0.5	S	1	S	≤ 0.5	S	≥16	R	≤0.12	S	≥128	R	≤ 0.5	S	≤0.03	S	≤10	S	24	S	22	S	24	S	20	S	18	S	27	S
inter2x359	Alternative	S. simulans	neg	≤ 0.25	S	≤0.5	S	≤ 0.12	I	neg	0.5	S	≤0.12	S	2	S	≤0.12	S	1	S	≤ 0.5	S	≤1	S	≤0.12	S	≤8	S	≤ 0.5	S	≤0.03	S	≤10	S	19	S	24	S	24	S	19	S	25	S	28	S
inter2x360	Alternative	S. simulans	neg	≤ 0.25	S	≤0.5	S	≤ 0.12	I	neg	0.5	S	≤0.12	S	2	S	≤0.12	S	1	S	≤ 0.5	S	≥16	R	≤0.12	S	≤8	S	≤ 0.5	S	≤0.03	S	≤10	S	22	S	25	S	30	S	21	S	29	S	30	S
inter2x361	Alternative	S. simulans	neg	≤ 0.25	S	≤0.5	S	≤ 0.12	I	neg	≤0.25	S	≤0.12	S	1	S	≤0.12	S	1	S	≤ 0.5	S	≤1	S	≤0.12	S	≤8	S	≤ 0.5	S	≤0.03	S	≤10	S	21	S	25	S	25	S	18	S	24	S	27	S
inter2x178	Alternative	S. arlettae	neg	≥4	R	≤0.5	S	0.5	I	neg	1	S	≥4	R	4	S	≤0.12	S	2	S	1	S	≤1	S	≤0.12	S	≥128	R	≤0.5	S	≤0.03	S	≤10	S	28	S	28	S	29	S	17	S	25	S	30	S
inter2x363	Alternative	S. haemolyticus	neg	≤ 0.25	S	≤0.5	S	0.5	I	neg	0.5	S	1	R	1	S	0.25	S	1	S	≤ 0.5	S	≤1	S	≤0.12	S	≤8	S	≤ 0.5	S	≤0.03	S	≤10	S	25	S	26	S	26	S	20	S	24	S	27	S
inter2x188	Alternative	M. lentus	neg	2	S	≤0.5	S	0.5	I	neg	0.5	S	1*	R	2	S	0.25	S	1	S	≤0.5	S	≤1	S	≤0.12	S	≤8	S	4	R	≤0.03	S	≤10	S	21	S	24	S	25	S	18	S	20	S	28	S
inter2x191	Alternative	M. lentus	neg	2	S	≤0.5	S	0.5	I	neg	1	S	>2*	R	1	S	≤0.12	S	1	S	≤0.5	S	≤1	S	≤0.12	S	≤8	S	4	R	≤0.03	S	≤10	S	23	S	25	S	27	S	18	S	20	S	30	S
inter2x195	Alternative	M. lentus	neg	2	S	≤0.5	S	0.5	I	neg	1	S	>2*	R	2	S	0.25	S	1	S	1	S	≤1	S	≤0.12	S	≤8	S	4	R	≤0.03	S	≤10	S	23	S	25	S	27	S	17	S	21	S	32	S
inter2x197	Alternative	S. epidermidis	pos	>2	R	≤0.5	S	≤0.12	I	neg	1	S	>2	R	1	S	0.5	S	4	S	1	S	≤1	S	≤0.12	S	≤8	S	≤0.5	S	≤0.03	S	20	S	22	S	25	S	27	S	0	R	22	S	31	S
inter2x200	Alternative	S. simulans	neg	≤0.25	S	≤0.5	S	≤0.12	I	neg	≤0.25	S	0.25	S	1	S	≤0.12	S	1	S	≤0.5	S	≤1	S	≤0.12	S	≤8	S	≤0.5	S	≤0.03	S	≤10	S	20	S	28	S	28	S	23	S	27	S	35	S
inter2x384	Alternative	S. simulans	neg	≤ 0.25	S	≤0.5	S	≤ 0.12	I	neg	0.5	S	0.5	S	1	S	≤0.12	S	1	S	≤ 0.5	S	≤1	S	≤0.12	S	≤8	S	≤ 0.5	S	≤0.03	S	≤10	S	26	S	25	S	25	S	19	S	27	S	30	S
inter2x369	Alternative	S. xylosus	neg	0.5	S	≤0.5	S	0.5	I	neg	1	S	0.25	S	2	S	0.5	S	1	S	1	S	≥16*	R	0.25	S	≤8	S	8	R	0.06	S	≤10	S	26	S	25	S	25	S	18	S	25	S	29	S
inter2x207	Alternative	S. chromogenes	neg	≤0.25	S	≤0.5	S	≤0.12	I	neg	1	S	≤0.12	S	1	S	0.25	S	1	S	≤0.5	S	≤1	S	≤0.12	S	≤8	S	≤0.5	S	≤0.03	S	≤10	S	22	S	28	S	30	S	25	S	28	S	36	S
inter2x211	Alternative	S. simulans	neg	≤0.25	S	≤0.5	S	≤0.12	I	neg	≤0.25	S	0.25	S	1	S	≤0.12	S	≤0.5	S	≤0.5	S	≤1	S	≤0.12	S	≤8	S	≤0.5	S	≤0.03	S	≤10	S	27	S	25	S	27	S	20	S	25	S	32	S
inter2x213	Alternative	S. simulans	neg	≤0.25	S	≤0.5	S	≤0.12	I	neg	≤0.25	S	0.25	S	1	S	≤0.12	S	≤0.5	S	≤0.5	S	≤1	S	≤0.12	S	≤8	S	≤0.5	S	≤0.03	S	≤10	S	26	S	10	R	23	S	21	S	25	S	29	S
inter2x214	Alternative	S. simulans	neg	≤0.25	S	≤0.5	S	≤0.12	I	neg	>4	R	>2	R	1	S	≤0.12	S	≤0.5	S	≤0.5	S	≤1	S	≤0.12	S	>64	R	≤0.5	S	≤0.03	S	≤10	S	26	S	27	S	29	S	0	R	28	S	35	S
inter2x215	Alternative	S. simulans	neg	≤0.25	S	≤0.5	S	≤0.12	I	neg	>4	R	0.5	I	1	S	≤0.12	S	≤0.5	S	≤0.5	S	≤1	S	≤0.12	S	≤8	S	≤0.5	S	≤0.03	S	≤10	S	22	S	25	S	29	S	0	R	23	S	33	S
inter2x216	Alternative	S. simulans	neg	≤0.25	S	≤0.5	S	≤0.12	I	pos	>4	R	0.25	R	1	S	≤0.12	S	1	S	≤0.5	S	≤1	S	≤0.12	S	≤8	S	≤0.5	S	≤0.03	S	≤10	S	26	S	10	R	28	S	0	R	26	S	32	S
inter2x217	Alternative	S. pasteuri	neg	0.5	S	≤0.5	S	0.25	I	neg	≤0.25	S	≤0.12	S	1	S	0.25	S	1	S	≤0.5	S	≤1	S	≤0.12	S	>64	R	≤0.5	R	≤0.03	S	≤10	S	20	S	25	S	28	S	21	S	26	S	30	S
inter2x218	Alternative	S. chromogenes	neg	≤0.25	S	≤0.5	S	≤0.12	I	neg	1	S	≤0.12	S	1	S	0.25	S	2	S	≤0.5	S	≤1	S	≤0.12	S	≤8	S	≤0.5	S	≤0.03	S	≤10	S	34	S	30	S	36	S	28	S	31	S	40	S
inter2x219	Alternative	S. simulans	neg	≤0.25	S	≤0.5	S	≤0.12	I	neg	≤0.25	S	0.25	S	1	S	≤0.12	S	≤0.5	S	≤0.5	S	>8	R	≤0.12	S	≤8	S	≤0.5	S	≤0.03	S	≤10	S	20	S	25	S	28	S	22	S	27	S	34	S
inter2x370	Alternative	S. epidermidis	neg	≤ 0.25	S	≤0.5	S	≤ 0.12	I	neg	≤0.25	S	0.25	S	1	S	0.5	S	4	S	1	S	≤1	S	≤0.12	S	≤8	S	≤ 0.5	S	≤0.03	S	80	R	22	S	25	S	26	S	18	S	27	S	31	S
inter2x224	Alternative	S. simulans	neg	≤0.25	S	≤0.5	S	≤0.12	I	neg	≤0.25	S	0.25	S	1	S	≤0.12	S	≤0.5	S	≤0.5	S	≤1	S	≤0.12	S	≤8	S	≤0.5	S	≤0.03	S	≤10	S	27	S	26	S	27	S	19	S	21	S	33	S
inter2x230	Alternative	S. simulans	neg	≤0.25	S	≤0.5	S	≤0.12	I	neg	≤0.25	S	0.25	S	1	S	≤0.12	S	1	S	≤0.5	S	≤1	S	≤0.12	S	≤8	S	≤0.5	S	≤0.03	S	≤10	S	25	S	26	S	27	S	21	S	28	S	32	S
inter2x231	Alternative	S. simulans	neg	≤0.25	S	≤0.5	S	≤0.12	I	neg	≤0.25	S	0.25	S	1	S	≤0.12	S	1	S	≤0.5	S	≤1	S	≤0.12	S	≤8	S	≤0.5	S	≤0.03	S	≤10	S	23	S	25	S	28	S	22	S	27	S	34	S
inter2x233	Alternative	S. xylosus	pos	0.5	S	≤0.5	S	0.5	I	neg	1	S	0.25	S	2	S	0.25	S	1	S	1	S	≤1	S	≤0.12	S	≤8	S	8	R	≤0.03	S	≤10	S	24	S	26	S	28	S	19	S	24	S	30	S
inter2x234	Alternative	S. simulans	neg	≤0.25	S	≤0.5	S	≤0.12	I	neg	≤0.25	S	0.25	S	4	S	≤0.12	S	1	S	≤0.5	S	≤1	S	≤0.12	S	≤8	S	≤0.5	S	≤0.03	S	≤10	S	20	S	27	S	27	S	16	S	24	S	27	S
inter2x240	Alternative	S. simulans	neg	≤0.25	S	≤0.5	S	≤0.12	I	neg	≤0.25	S	≤0.12	S	1	S	≤0.12	S	≤0.5	S	≤0.5	S	≤1	S	≤0.12	S	≤8	S	≤0.5	S	≤0.03	S	≤10	S	25	S	23	S	25	S	20	S	25	S	28	S
inter2x242	Alternative	S. haemolyticus	neg	≤0.25	S	≤0.5	S	0.5	I	neg	0.5	S	0.25	S	1	S	0.25	S	2	S	≤0.5	S	≤1	S	≤0.12	S	64	R	≤0.5	S	≤0.03	S	≤10	S	27	S	25	S	28	S	25	S	28	S	27	S
inter2x375	Alternative	S. simulans	neg	≤ 0.25	S	≤0.5	S	≤ 0.12	I	pos	≥8	R	0.25	R	1	S	≤0.12	S	1	S	≤ 0.5	S	≤1	S	≤0.12	S	≤8	S	≤ 0.5	S	≤0.03	S	≤10	S	23	S	25	S	27	S	0	R	27	S	34	S
inter2x376	Alternative	S. chromogenes	neg	≤ 0.25	S	≤0.5	S	≤ 0.12	I	neg	0.5	S	0.5	I	1	S	≤0.12	S	1	S	≤ 0.5	S	≤1	S	≤0.12	S	≤8	S	≤ 0.5	S	≤0.03	S	≤10	S	22	S	24	S	27	S	19	S	24	S	31	S
inter2x243	Alternative	S. simulans	neg	≤0.25	S	≤0.5	S	≤0.12	I	neg	≤0.25	S	0.25	S	1	S	0.25	S	1	S	≤0.5	S	>8	R	0.5	S	≤8	S	≤0.5	S	≤0.03	S	≤10	S	20	S	25	S	27	S	20	S	27	S	28	S
inter2x245	Organic	S. simulans	neg	≤0.25	S	≤0.5	S	≤0.12	I	neg	≤0.25	S	0.25	S	1	S	≤0.12	S	≤0.5	S	≤0.5	S	>8	R	0.25	S	≤8	S	≤0.5	S	≤0.03	S	160	R	26	S	23	S	24	S	18	S	25	S	28	S
inter2x246	Organic	S. simulans	neg	≤0.25	S	≤0.5	S	≤0.12	I	neg	≤0.25	S	0.25	S	1	S	≤0.12	S	≤0.5	S	≤0.5	S	≤1	S	≤0.12	S	≤8	S	≤0.5	S	≤0.03	S	≤10	S	20	S	24	S	24	S	17	S	23	S	32	S
inter2x247	Organic	S. simulans	neg	≤0.25	S	≤0.5	S	≤0.12	I	neg	>4	R	>2*	R	1	S	≤0.12	S	≤0.5	S	≤0.5	S	≤1	S	≤0.12	S	≤8	S	≤0.5	S	≤0.03	S	≤10	S	20	S	22	S	24	S	18	S	27	S	34	S
inter2x248	Organic	S. simulans	neg	≤0.25	S	≤0.5	S	≤0.12	I	neg	≤0.25	S	0.25	S	1	S	≤0.12	S	1	S	≤0.5	S	≤1	S	≤0.12	S	≤8	S	≤0.5	S	≤0.03	S	≤10	S	21	S	23	S	25	S	20	S	22	S	36	S
inter2x250	Organic	S. simulans	neg	≤0.25	S	≤0.5	S	≤0.12	I	neg	≤0.25	S	0.25	S	1	S	≤0.12	S	≤0.5	S	≤0.5	S	>8	R	0.25	S	≤8	S	≤0.5	S	≤0.03	S	160	R	25	S	27	S	28	S	22	S	28	S	35	S
inter2x383	Organic	S. xylosus	neg	0.5	S	≤0.5	S	1	I	neg	1	S	0.25	S	2	S	0.25	S	1	S	1	S	2	I	≤0.12	S	≤8	S	8	R	≤0.03	S	≤10	S	25	S	24	S	26	S	18	S	23	S	28	S
inter2x256	Organic	S. xylosus	neg	0.5	S	≤0.5	S	0.5	I	neg	1	S	0.25	S	4	S	0.25	S	1	S	1	S	2	I	0.25	S	64*	R	4	R	0.06	S	≤10	S	26	S	21	S	28	S	20	S	22	S	28	S
inter2x257	Organic	S. xylosus	neg	0.5	S	≤0.5	S	0.5	I	neg	1	S	0.25	S	2	S	0.25	S	1	S	1	S	≤1	S	≤0.12	S	≤8	S	8	R	≤0.03	S	≤10	S	25	S	27	S	30	S	20	S	26	S	32	S
inter2x258	Organic	S. xylosus	neg	0.5	S	≤0.5	S	0.5	I	neg	1	S	0.5	I	2	S	0.25	S	1	S	≤0.5	S	≤1	S	≤0.12	S	≤8	S	8	R	≤0.03	S	≤10	S	25	S	24	S	25	S	18	S	24	S	26	S
inter2x261	Organic	S. xylosus	neg	0.5	S	≤0.5	S	0.5	I	neg	1	S	0.5	I	2	S	0.25	S	1	S	1	S	≤1	S	≤0.12	S	≤8	S	8	R	≤0.03	S	≤10	S	30	S	28	S	28	S	29	S	26	S	30	S
inter2x262	Organic	S. xylosus	pos	0.5	R	≤0.5	S	0.5	I	neg	1	S	0.5	I	2	S	≤0.12	S	1	S	1	S	>8	R	≤0.12	S	≤8	S	8	R	≤0.03	S	≤10	S	26	S	26	S	28	S	19	S	26	S	30	S
inter2x263	Organic	S. xylosus	neg	0.5	S	≤0.5	S	0.5	I	neg	1	S	0.25	S	2	S	0.25	S	1	S	1	S	>8*	R	0.25	S	≤8	S	8	R	≤0.03	S	≤10	S	26	S	25	S	28	S	17	S	26	S	29	S
inter2x265	Organic	S. xylosus	neg	0.5	S	≤0.5	S	0.5	I	neg	1	S	0.5	I	2	S	0.25	S	1	S	1	S	>8*	R	0.5	S	16	R	8	R	≤0.03	S	≤10	S	25	S	27	S	29	S	17	S	24	S	30	S
inter2x266	Organic	M. Sciuri	neg	2	R	≤0.5	S	0.25	I	neg	1	S	0.5	S	2	S	2	R	1	S	≤0.5	S	≤1	S	≤0.12	S	≤8	S	8	R	≤0.03	S	≤10	S	24	S	27	S	26	S	20	S	22	S	27	S
inter2x366	Organic	S. simulans	neg	≥4	R	≤0.5	S	≤ 0.12	I	neg	≤0.25	S	0.5	R	1	S	≤0.12	S	≤0.5	S	≤ 0.5	S	≤1	S	≤0.12	S	≥128	R	≤ 0.5	R	≤0.03	S	≤10	S	24	S	27	S	26	S	22	S	22	S	30	S
inter2x271	Organic	S. xylosus	neg	0.5	R	≤0.5	S	1	I	neg	1	S	0.5	S	4	S	0.5	S	1	S	1	S	>8*	R	0.5	S	>64	R	8	R	≤0.03	S	≤10	S	27	S	25	S	25	S	20	S	26	S	30	S
inter2x367	Organic	S. haemolyticus	neg	≤ 0.25	S	≤0.5	S	0.5	I	neg	0.5	S	≥4	R	2	S	0.5	S	4	S	1	S	≤1	S	≤0.12	S	≤8	S	≤ 0.5	S	≤0.03	S	≤10	S	26	S	25	S	24	S	19	S	24	S	28	S
inter2x272	Organic	S. xylosus	neg	0.5	S	≤0.5	S	0.5	I	neg	1	S	0.5	S	4	S	0.5	S	1	S	1	S	2	I	≤0.12	S	≤8	S	8	R	0.12	I	≤10	S	27	S	25	S	28	S	20	S	20	S	29	S
inter2x274	Organic	S. xylosus	neg	0.5	S	≤0.5	S	1	I	neg	1	S	0.5	S	>4	R	0.5	S	1	S	1	S	2	I	0.25	S	≤8	S	8	R	0.25*	I	≤10	S	28	S	26	S	28	S	21	S	25	S	32	S
inter2x368	Organic	S. simulans	neg	≤ 0.25	S	≤0.5	S	0.5	I	neg	≤0.25	S	0.25	S	1	S	≤0.12	S	1	S	≤ 0.5	S	≤1	S	≤0.12	S	≤8	S	≤ 0.5	S	≤0.03	S	≤10	S	19	S	26	S	30	S	21	S	26	S	25	S
inter2x278	Organic	S. simulans	neg	≤0.25	S	≤0.5	S	≤0.12	I	neg	≤0.25	S	0.25	S	1	S	≤0.12	S	≤0.5	S	≤0.5	S	≤1	S	≤0.12	S	≤8	S	≤0.5	S	≤0.03	S	≤10	S	26	S	29	S	30	S	23	S	30	S	34	S
inter2x279	Organic	S. cohnii	neg	2	R	≤0.5	S	0.25	I	neg	4	R	>2	R	2	S	0.25	S	4	S	≤0.5	S	≤1	S	≤0.12	S	≤8	S	8	R	0.5	I	≤10	S	26	S	25	S	27	S	18	S	20	S	30	S
inter2x280	Organic	S. simulans	neg	≤0.25	S	≤0.5	S	≤0.12	I	neg	≤0.25	S	≤0.12	S	1	S	≤0.12	S	≤0.5	S	≤0.5	S	≤1	S	≤0.12	S	≤8	S	≤0.5	S	≤0.03	S	≤10	S	27	S	26	S	29	S	24	S	27	S	33	S
inter2x365	Organic	S. simulans	neg	≤ 0.25	S	≤0.5	S	0.5	I	neg	≤0.25	S	0.25	S	1	S	≤0.12	S	1	S	≤ 0.5	S	≤1	S	≤0.12	S	≤8	S	≤ 0.5	S	≤0.03	S	≤10	S	21	S	26	S	27	S	19	S	25	S	25	S
inter2x281	Organic	M. lentus	neg	2	S	≤0.5	S	0.5	I	neg	1	S	>2*	R	2	S	0.25	S	1	S	1	S	≤1	S	≤0.12	S	≤8	S	2	R	≤0.03	S	≤10	S	21	S	23	S	24	S	18	S	21	S	31	S
inter2x285	Organic	S. simulans	neg	≤0.25	S	≤0.5	S	≤0.12	I	neg	≤0.25	S	0.5	I	1	S	≤0.12	S	≤0.5	S	≤0.5	S	≤1	S	≤0.12	S	≤8	S	≤0.5	S	≤0.03	S	≤10	S	28	S	25	S	27	S	22	S	27	S	31	S
inter2x286	Organic	S. simulans	neg	≤0.25	S	≤0.5	S	≤0.12	I	neg	≤0.25	S	0.5	I	1	S	≤0.12	S	≤0.5	S	≤0.5	S	≤1	S	≤0.12	S	≤8	S	≤0.5	S	≤0.03	S	≤10	S	22	S	26	S	27	S	22	S	27	S	32	S
inter2x287	Organic	S. simulans	neg	≤0.25	S	≤0.5	S	≤0.12	I	neg	≤0.25	S	≤0.12	S	1	S	≤0.12	S	≤0.5	S	≤0.5	S	≤1	S	≤0.12	S	16	S	≤0.5	S	≤0.03	S	≤10	S	20	S	27	S	28	S	25	S	27	S	32	S
inter2x288	Organic	S. xylosus	neg	0.5	R	≤0.5	S	0.5	I	neg	1	S	0.25	S	2	S	0.25	S	1	S	1	S	>8	R	0.25	S	≤8	S	16	R	≤0.03	S	≤10	S	30	S	27	S	28	S	20	S	28	S	30	S
inter2x289	Organic	M. lentus	neg	2	R	≤0.5	S	0.5	I	neg	>4	R	>2	R	2	S	≤0.12	S	1	S	≤0.5	S	>8	R	0.25	S	≤8	S	4	R	≤0.03	S	≤10	S	21	S	26	S	30	S	20	S	23	S	30	S
inter2x290	Organic	S. simulans	neg	≤0.25	S	≤0.5	S	≤0.12	I	neg	≤0.25	S	0.25	S	4	S	≤0.12	S	1	S	≤0.5	S	≤1	S	≤0.12	S	≤8	S	≤0.5	S	≤0.03	S	≤10	S	23	S	26	S	27	S	18	S	27	S	34	S
inter2x293	Organic	S. simulans	neg	≤0.25	S	≤0.5	S	≤0.12	I	neg	≤0.25	S	0.25	S	4	S	≤0.12	S	1	S	≤0.5	S	2	I	≤0.12	S	≤8	S	≤0.5	S	≤0.03	S	≤10	S	30	S	25	S	28	S	24	S	27	S	40	S
inter2x296	Organic	S. xylosus	neg	0.5	S	≤0.5	S	0.5	I	neg	1	S	0.25	S	2	S	0.25	S	1	S	1	S	2	I	≤0.12	S	≤8	S	8	R	≤0.03	S	≤10	S	23	S	26	S	27	S	19	S	27	S	29	S
inter2x297	Organic	S. pasteuri	neg	0.5	S	≤0.5	S	0.25	I	neg	≤0.25	S	≤0.12	S	2	S	0.5	S	1	S	≤0.5	S	>8	R	≤0.12	S	>64	R	≤0.5	R	≤0.03	S	≤10	S	18	S	22	S	24	S	21	S	22	S	30	S
inter2x300	Organic	S. xylosus	neg	0.5	S	≤0.5	S	0.5	I	neg	1	S	0.25	S	2	S	0.25	S	1	S	1	S	≤1	S	≤0.12	S	>64*	R	8	R	≤0.03	S	≤10	S	28	S	26	S	28	S	19	S	26	S	30	S
inter2x371	Organic	S. xylosus	neg	≤ 0.25	S	≤0.5	S	0.5	I	neg	1	S	0.5	I	2	S	0.25	S	1	S	1	S	≤1	S	≤0.12	S	≥128*	R	8	R	≤0.03	S	≤10	S	28	S	27	S	29	S	18	S	28	S	31	S
inter2x301	Organic	S. saprophyticus	neg	2	S	≤0.5	S	1	I	neg	1	S	0.25	S	4	S	≤0.12	S	1	S	1	S	>8	R	≤0.12	S	>64	R	4	R	≤0.03	S	≤10	S	25	S	25	S	26	S	18	S	27	S	29	S
inter2x303	Organic	S. cohnii	neg	2	R	≤0.5	S	0.5	I	neg	4	R	0.25	S	4	S	0.25	S	2	S	1	S	>8	R	0.25	S	≤8	S	8	R	0.06	S	≤10	S	28	S	25	S	28	S	18	S	24	S	30	S
inter2x304	Organic	S. xylosus	neg	0.5	S	≤0.5	S	0.5	I	neg	1	S	0.25	S	2	S	0.25	S	1	S	1	S	≥16*	R	0.25	S	16	S	8	R	0.06	S	≤10	S	28	S	25	S	27	S	22	S	26	S	28	S
inter2x377	Organic	S. xylosus	neg	0.5	S	≤0.5	S	0.5	I	neg	1	S	0.5	S	2	S	0.25	S	1	S	1	S	2	I	≤0.12	S	≤8	S	8	R	≤0.03	S	≤10	S	28	S	26	S	27	S	17	S	28	S	31	S
inter2x308	Organic	S. haemolyticus	neg	≤ 0.25	S	≤0.5	S	≤ 0.12	I	neg	1	S	0.25	S	1	S	≤0.12	S	2	S	≤ 0.5	S	2	R	≤0.12	S	>64	R	≤ 0.5	S	≤0.03	S	≤10	S	25	S	27	S	28	S	20	S	24	S	32	S

## Sheet: Genotypic AMR screening data
Isolate ID	Farm Type	Species	Genotypic name ID	aac(6')-Ie/aph(2'')-Ia	aadD1	ant(6)-Ia	ant(9)-Ia	blaARL-1	blaPC1	blaZ	fosB	fosD	fusD	fusF	lnu(A)	lnu(A)'	lnu(B)	lsa(E)	sal(A)	vga(A)	vga(A)-LC	vga(E)	erm(43)	erm(A)	erm(C)	erm(T)	mph(C)	msr(A)	mecA	catA	cmx	fexA	spd	spw	sul1	tet(33)	tet(K)	tet(L)	tet(M)	tet(Z)	dfrC	dfrD	dfrG	dfrK	arsB	arsC	arsR	cadC	cadD
inter2x002	Conventional	S. simulans	inter2x002_S66_L000_R1_001	0	0	0	0	0	0	1	0	0	0	0	0	0	0	0	0	1	0	0	0	0	1	0	0	0	0	1	0	0	0	0	0	0	1	0	0	0	0	0	0	0	0	0	0	0	0
inter2x003	Conventional	S. epidermidis	inter2x003_S67_L000_R1_001	0	0	0	0	0	0	1	1	0	0	0	0	0	0	0	0	0	0	0	0	0	1	0	0	0	0	0	0	0	0	0	0	0	0	0	0	0	1	0	0	0	1	1	1	0	1
inter2x004	Conventional	S. simulans	inter2x004_S68_L000_R1_001	0	0	0	0	0	0	1	0	0	0	0	0	0	0	0	0	1	0	0	0	0	1	0	0	0	0	1	0	0	0	0	0	0	0	0	0	0	0	0	0	0	0	0	0	0	0
inter2x006	Conventional	S. warneri	inter2x006_S69_L000_R1_001	0	0	0	0	0	0	0	0	0	0	0	0	0	0	0	0	0	0	0	0	0	1	0	0	0	0	0	0	0	1	0	0	0	1	0	0	0	0	0	1	0	0	1	1	0	1
inter2x008	Conventional	S. haemolyticus	inter2x008_S70_L000_R1_001	0	0	0	0	0	0	0	0	0	0	0	0	0	0	0	0	0	0	0	0	0	1	0	0	0	0	0	0	1	0	0	0	0	0	0	0	0	0	0	0	0	0	0	0	0	0
inter2x023	Conventional	S. simulans	inter2x023_S79_L000_R1_001	0	0	0	0	0	0	0	0	0	0	0	0	0	0	0	0	0	0	0	0	0	0	0	0	0	0	0	0	0	0	0	0	0	0	0	0	0	0	0	0	0	1	1	0	0	1
inter2x025	Conventional	S. felis	inter2x025_S80_L000_R1_001	0	0	0	0	0	1	0	0	0	0	0	0	0	0	0	0	0	0	0	0	0	0	0	0	0	0	0	0	0	0	0	0	0	0	0	0	0	0	0	0	0	0	0	0	0	0
inter2x026	Conventional	S. simulans	inter2x026_S81_L000_R1_001	0	0	0	0	0	0	0	0	0	0	0	0	0	0	0	0	0	0	0	0	0	0	0	0	0	0	0	0	0	0	0	0	0	0	0	0	0	0	0	0	0	0	0	0	0	0
inter2x028	Conventional	S. simulans	inter2x028_S82_L000_R1_001	0	0	0	0	0	0	0	0	0	0	0	0	0	0	0	0	0	0	0	0	0	0	0	0	0	0	0	0	0	0	0	0	0	0	0	0	0	0	0	0	0	1	1	0	0	1
inter2x029	Conventional	S. simulans	inter2x029_S83_L000_R1_001	0	0	0	0	0	0	0	0	0	0	0	0	0	0	0	0	0	0	0	0	0	0	0	0	0	0	0	0	0	0	0	0	0	1	0	0	0	0	0	0	0	1	1	0	0	1
inter2x030	Conventional	S. pasteuri	inter2x030_S84_L000_R1_001	0	0	0	0	0	0	0	0	0	0	0	0	0	0	0	0	0	0	0	0	0	0	0	0	0	0	0	0	0	0	0	0	0	1	0	0	0	0	0	0	0	0	0	0	0	1
inter2x031	Conventional	S. haemolyticus	inter2x031_S85_L000_R1_001	0	0	0	0	0	0	0	0	0	0	0	0	0	0	0	0	0	1	0	0	0	0	0	0	0	0	0	0	0	0	0	0	0	0	0	1	0	0	0	0	0	0	0	0	0	0
inter2x033	Conventional	S. cohnii	inter2x033_S86_L000_R1_001	0	0	0	0	0	0	0	0	0	0	1	0	0	0	0	0	0	0	0	0	0	0	0	0	1	0	0	0	0	0	0	0	0	0	0	0	0	0	0	0	0	1	1	1	0	1
inter2x034	Conventional	S. simulans	inter2x034_S87_L000_R1_001	0	1	0	0	0	0	1	0	0	0	0	0	0	0	0	0	0	0	0	0	0	0	0	0	0	0	0	0	0	0	0	0	0	0	0	0	0	0	0	0	0	0	0	0	0	0
inter2x035	Conventional	S. simulans	inter2x035_S88_L000_R1_001	0	0	0	0	0	0	0	0	0	0	0	0	0	0	0	0	0	0	0	0	0	0	0	0	0	0	0	0	0	0	0	0	0	0	0	0	0	0	0	0	0	0	0	0	0	0
inter2x036	Conventional	S. simulans	inter2x036_S89_L000_R1_001	0	0	0	0	0	1	0	0	0	0	0	0	0	0	0	0	0	0	0	0	0	0	0	0	0	0	0	0	0	0	0	0	0	1	0	0	0	0	0	0	0	1	1	0	0	1
inter2x038	Conventional	S. simulans	inter2x038_S90_L000_R1_001	0	0	0	0	0	0	0	0	0	0	0	0	0	0	0	0	0	0	0	0	0	0	0	0	0	0	0	0	0	0	0	0	0	1	0	0	0	0	0	0	0	0	0	0	0	0
inter2x040	Conventional	S. simulans	inter2x040_S91_L000_R1_001	0	0	0	0	0	0	1	0	0	0	0	0	0	0	0	0	0	0	0	0	0	0	0	0	0	0	0	0	0	0	0	0	0	1	0	0	0	0	0	1	0	1	1	1	0	0
inter2x041	Conventional	S. simulans	inter2x041_S92_L000_R1_001	0	0	0	0	0	1	0	0	0	0	0	0	0	0	0	0	0	0	0	0	0	0	0	0	0	0	0	0	0	0	0	0	0	1	0	0	0	0	0	0	0	1	1	0	0	1
inter2x042	Conventional	S. haemolyticus	inter2x042_S93_L000_R1_001	0	0	0	0	0	0	0	0	0	0	0	0	0	0	0	0	0	0	0	0	0	0	0	0	0	0	0	0	0	0	0	0	0	1	0	0	0	0	0	0	0	0	0	0	0	0
inter2x043	Conventional	S. simulans	inter2x043_S94_L000_R1_001	0	0	0	0	0	0	0	0	0	0	0	0	0	0	0	0	0	0	0	0	0	0	0	0	0	0	0	0	0	0	0	0	0	0	0	0	0	0	0	0	0	0	0	0	0	0
inter2x044	Conventional	S. warneri	inter2x044_S95_L000_R1_001	1	1	1	0	0	0	1	0	0	0	0	0	0	1	1	0	0	0	0	0	0	0	0	0	0	0	0	0	0	0	1	0	0	1	0	0	0	1	0	0	0	0	0	1	0	0
inter2x045	Conventional	S. simulans	inter2x045_S96_L000_R1_001	0	0	0	0	0	0	0	0	0	0	0	0	0	0	0	0	0	0	0	0	0	0	0	0	0	0	0	0	0	0	0	0	0	1	0	0	0	0	0	0	0	1	1	0	0	1
inter2x046	Conventional	S. simulans	inter2x046_S97_L000_R1_001	0	0	0	0	0	0	0	0	0	0	0	0	0	0	0	0	1	0	0	0	0	0	0	0	0	0	0	0	0	0	0	0	0	1	0	0	0	0	0	0	0	0	0	0	0	0
inter2x047	Conventional	S. simulans	inter2x047_S98_L000_R1_001	0	0	0	0	0	0	0	0	0	0	0	0	0	0	0	0	0	0	0	0	0	0	0	0	0	0	0	0	0	0	0	0	0	0	0	0	0	0	0	0	0	0	0	0	0	0
inter2x048	Conventional	S. hominis	inter2x048_S99_L000_R1_001	0	1	0	0	0	0	1	0	0	0	0	0	0	0	0	0	0	1	0	0	0	0	0	0	0	0	0	0	0	0	0	0	0	0	1	1	0	0	0	0	1	0	0	0	0	0
inter2x049	Conventional	S. epidermidis	inter2x049_S100_L000_R1_001	0	0	0	0	0	0	1	1	0	0	0	0	0	0	0	0	0	0	0	0	0	0	0	0	0	0	0	0	1	0	0	0	0	1	0	0	0	1	0	1	0	1	0	0	0	1
inter2x050	Conventional	S. warneri	inter2x050_S101_L000_R1_001	0	0	1	0	0	0	1	0	0	0	0	0	0	1	1	0	0	0	0	0	0	0	0	0	0	0	0	0	1	0	1	0	0	1	0	0	0	0	0	0	0	0	0	1	0	0
inter2x053	Conventional	S. pettenkoferi	inter2x053_S102_L000_R1_001	0	0	0	0	0	0	0	0	0	0	0	1	0	0	0	0	0	0	0	0	0	0	0	0	0	0	0	0	0	0	0	0	0	1	0	0	0	0	0	0	0	1	1	1	0	0
inter2x055	Conventional	S. simulans	inter2x055_S103_L000_R1_001	0	0	0	0	0	0	0	0	0	0	0	0	0	0	0	0	0	0	0	0	0	1	0	0	0	0	0	0	0	0	0	0	0	0	1	0	0	0	0	0	0	1	1	0	0	1
inter2x056	Conventional	S. haemolyticus	inter2x056_S104_L000_R1_001	0	0	0	0	0	0	0	0	0	0	0	0	0	0	0	0	0	1	0	0	0	0	0	0	0	0	0	0	0	0	0	0	0	0	0	0	0	0	0	0	0	0	0	0	0	0
inter2x057	Conventional	S. haemolyticus	inter2x057_S105_L000_R1_001	0	0	0	0	0	0	0	0	0	0	0	0	0	0	0	0	0	0	0	0	0	0	0	0	0	0	0	0	1	0	0	0	0	1	0	0	0	0	0	0	0	0	0	0	0	0
inter2x058	Conventional	S. simulans	inter2x058_S106_L000_R1_001	0	0	0	0	0	1	0	0	0	0	0	0	0	0	0	0	1	0	0	0	0	0	0	0	0	0	0	0	0	0	0	0	0	1	0	0	0	0	0	0	0	0	0	0	0	0
inter2x059	Conventional	S. simulans	inter2x059_S107_L000_R1_001	0	0	0	0	0	0	0	0	0	0	0	0	0	0	0	0	0	0	0	0	0	0	0	0	0	0	0	0	0	0	0	0	0	1	0	0	0	0	0	0	0	0	0	0	0	0
inter2x060	Conventional	S. simulans	Inter2x060_S108_L000_R1_001	0	0	0	0	0	0	1	0	0	0	0	0	0	0	0	0	0	0	0	0	0	0	0	0	0	0	0	0	0	0	0	0	0	1	0	0	0	0	0	0	0	0	0	0	0	0
inter2x061	Conventional	S. simulans	Inter2x061_S109_L000_R1_001	0	0	0	0	0	1	0	0	0	0	0	0	0	0	0	0	1	0	0	0	0	0	0	0	0	0	0	0	0	0	0	0	0	1	0	0	0	0	0	0	0	0	0	0	0	1
inter2x062	Conventional	S. haemolyticus	Inter2x062_S110_L000_R1_001	0	0	0	0	0	0	1	0	0	0	0	0	0	0	0	0	0	0	0	0	0	1	0	0	0	0	0	0	1	0	0	0	0	1	0	1	0	0	0	0	0	0	0	0	0	0
inter2x063	Conventional	S. simulans	Inter2x063_S111_L000_R1_001	0	0	0	0	0	0	1	0	0	0	0	0	0	0	0	0	0	0	0	0	0	0	0	0	0	0	0	0	0	0	0	0	0	1	0	0	0	0	0	0	0	0	0	0	0	0
inter2x064	Conventional	S. epidermidis	Inter2x064_S112_L000_R1_001	0	0	0	0	0	0	1	1	0	0	0	0	0	0	0	0	0	0	0	0	0	0	0	0	0	0	0	0	0	0	0	0	0	1	0	0	0	1	0	0	0	1	0	0	0	1
inter2x065	Conventional	S. simulans	Inter2x065_S113_L000_R1_001	0	0	0	0	0	0	0	0	0	0	0	0	0	0	0	0	0	0	0	0	0	0	0	0	0	0	0	0	0	0	0	0	0	1	0	0	0	0	0	0	0	1	1	0	0	1
inter2x067	Conventional	S. piscifermentans	Inter2x067_S114_L000_R1_001	0	0	0	0	0	0	0	0	0	0	0	0	0	0	0	0	0	0	0	0	0	1	0	0	0	0	1	0	0	0	0	0	0	1	0	0	0	0	0	0	0	1	1	0	0	0
inter2x068	Conventional	S. piscifermentans	Inter2x068_S115_L000_R1_001	0	0	0	0	0	0	0	0	0	0	0	0	0	0	0	0	0	0	0	0	0	1	0	0	0	0	0	0	0	0	0	0	0	1	0	0	0	0	0	0	0	1	1	0	0	0
inter2x069	Conventional	S. simulans	Inter2x069_S116_L000_R1_001	0	0	0	1	0	0	0	0	0	0	0	0	0	0	0	0	0	0	0	0	1	0	0	0	0	0	0	0	0	0	0	0	0	1	0	0	0	0	0	0	0	1	1	0	0	1
inter2x071	Conventional	S. simulans	Inter2x071_S117_L000_R1_001	0	0	0	1	0	0	0	0	0	0	0	0	0	0	0	0	0	0	0	0	1	0	0	0	0	0	0	0	0	0	0	0	0	1	0	0	0	0	0	0	0	1	1	0	0	1
inter2x072	Conventional	S. simulans	Inter2x072_S118_L000_R1_001	0	0	0	0	0	0	0	0	0	0	0	0	0	0	0	0	0	0	0	0	0	0	0	0	0	0	0	0	0	0	0	0	0	0	0	0	0	0	0	0	0	0	0	0	0	0
inter2x073	Conventional	S. simulans	Inter2x073_S119_L000_R1_001	0	0	0	0	0	0	0	0	0	0	0	0	0	0	0	0	0	0	0	0	0	1	0	0	0	0	0	0	0	0	0	0	0	1	1	0	0	0	0	0	0	0	0	0	0	0
inter2x074	Conventional	S. simulans	Inter2x074_S120_L000_R1_001	0	0	0	0	0	0	0	0	0	0	0	0	0	0	0	0	0	0	0	0	0	0	0	0	0	0	0	0	0	0	0	0	0	0	0	0	0	0	0	0	0	0	0	0	0	0
inter2x075	Conventional	S. simulans	Inter2x075_S121_L000_R1_001	0	0	0	0	0	0	0	0	0	0	0	0	0	0	0	0	0	0	0	0	0	1	0	0	0	0	0	0	0	0	0	0	0	0	0	0	0	0	0	0	0	1	1	0	0	1
inter2x078	Conventional	S. simulans	Inter2x078_S122_L000_R1_001	0	0	0	0	0	0	0	0	0	0	0	0	0	0	0	0	0	0	0	0	0	0	0	0	0	0	1	0	0	0	0	0	0	0	0	0	0	0	0	0	0	1	1	0	0	1
inter2x079	Conventional	S. haemolyticus	Inter2x079_S123_L000_R1_001	0	0	0	0	0	0	0	0	0	0	0	0	0	0	0	0	0	0	0	0	0	1	0	0	0	0	0	0	0	0	0	0	0	0	0	0	0	0	0	0	0	0	0	0	0	0
inter2x080	Conventional	S. haemolyticus	Inter2x080_S124_L000_R1_001	0	1	0	0	0	0	0	0	0	0	0	0	0	0	0	0	0	0	0	0	0	0	0	0	0	0	0	0	0	0	0	0	0	0	1	0	0	0	0	0	1	0	0	0	0	0
inter2x081	Conventional	S. chromogenes	Inter2x081_S125_L000_R1_001	0	0	0	0	0	0	1	0	0	0	0	0	0	0	0	0	0	0	0	0	0	0	0	0	0	0	0	0	0	0	0	0	0	0	0	0	0	0	0	0	0	1	1	0	0	0
inter2x082	Conventional	S. piscifermentans	Inter2x082_S126_L000_R1_001	0	0	0	0	0	0	0	0	0	0	0	0	0	0	0	0	0	0	0	0	0	0	0	0	0	0	0	0	0	0	0	0	0	1	0	0	0	0	0	0	0	1	1	1	0	0
inter2x083	Conventional	S. epidermidis	Inter2x083_S127_L000_R1_001	0	0	0	0	0	0	1	1	0	0	0	0	0	0	0	0	0	0	0	0	0	0	0	0	0	0	0	0	0	0	0	0	0	1	0	0	0	1	1	0	0	1	0	0	0	1
inter2x084	Conventional	S. chromogenes	Inter2x084_S128_L000_R1_001	0	0	0	0	0	0	1	0	0	0	0	0	0	0	0	0	0	0	0	0	0	0	0	0	0	0	0	0	0	0	0	0	0	0	0	0	0	0	0	0	0	1	1	0	0	0
inter2x086	Conventional	S. chromogenes	Inter2x086_S129_L000_R1_001	0	0	0	0	0	0	1	0	0	0	0	0	0	0	0	0	0	0	0	0	0	0	0	0	0	0	0	0	0	0	0	0	0	0	0	0	0	0	0	0	0	1	1	0	0	0
inter2x087	Conventional	S. simulans	Inter2x087_S130_L000_R1_001	0	0	0	0	0	1	0	0	0	0	0	0	0	0	0	0	0	0	0	0	0	1	0	0	0	0	0	0	0	0	0	0	0	0	0	0	0	0	0	0	0	0	0	0	0	0
inter2x088	Conventional	S. simulans	Inter2x088_S131_L000_R1_001	0	0	0	0	0	0	0	0	0	0	0	0	0	0	0	0	0	0	0	0	0	1	0	0	0	0	0	0	0	1	0	0	0	0	0	0	0	0	0	0	0	1	1	0	0	1
inter2x089	Conventional	S. haemolyticus	inter2x089_S132_L000_R1_001	0	0	0	0	0	0	0	0	0	0	0	0	0	0	0	0	0	0	0	0	0	1	0	0	0	0	0	0	0	0	0	0	0	1	1	0	0	0	0	0	0	1	1	0	0	1
inter2x090	Conventional	S. simulans	inter2x090_S133_L000_R1_001	0	0	0	0	0	0	0	0	0	0	0	0	0	0	0	0	1	0	0	0	0	1	0	0	0	0	0	0	0	0	0	0	0	1	0	0	0	0	0	0	0	1	1	0	0	1
inter2x091	Conventional	S. haemolyticus	inter2x091_S134_L000_R1_001	0	0	0	0	0	0	0	0	0	0	0	0	0	0	0	0	0	1	0	0	0	1	0	0	0	0	0	0	0	1	0	0	0	1	0	0	0	0	0	0	0	1	1	0	0	1
inter2x092	Conventional	S. hominis	inter2x092_S135_L000_R1_001	0	0	0	0	0	0	0	0	0	0	0	0	0	0	0	0	0	1	0	0	0	1	0	0	0	0	0	0	0	0	0	0	0	1	1	0	0	1	0	0	0	0	0	0	0	0
inter2x093	Conventional	S. pasteuri	inter2x093_S136_L000_R1_001	0	0	0	0	0	0	1	0	0	0	0	0	0	0	0	0	0	0	0	0	0	1	0	0	0	1	0	0	0	0	0	0	0	0	0	0	0	1	0	0	0	0	0	0	0	0
inter2x094	Conventional	S. simulans	inter2x094_S137_L000_R1_001	0	0	0	0	0	1	0	0	0	0	0	0	0	0	0	0	1	0	0	0	0	1	0	0	0	0	0	0	0	0	0	0	0	1	0	0	0	0	0	0	0	0	0	0	0	0
inter2x096	Conventional	S. haemolyticus	inter2x096_S138_L000_R1_001	0	1	0	0	0	0	0	0	0	0	0	0	0	0	0	0	0	0	0	0	0	1	0	0	0	1	0	0	0	0	0	0	0	0	0	0	0	0	0	0	0	0	0	0	0	0
inter2x098	Conventional	S. haemolyticus	inter2x098_S139_L000_R1_001	0	0	0	0	0	0	1	0	0	0	0	0	0	0	0	0	0	0	0	0	0	1	0	0	0	1	0	0	0	0	0	0	0	0	0	1	0	0	0	0	0	0	0	0	0	0
inter2x099	Conventional	S. chromogenes	inter2x099_S140_L000_R1_001	0	1	0	0	0	0	1	0	0	0	0	0	0	0	0	0	0	0	0	0	0	0	1	0	0	0	0	0	0	0	0	0	0	0	1	0	0	0	0	0	0	1	1	0	0	0
inter2x100	Conventional	S. simulans	inter2x100_S141_L000_R1_001	0	1	0	0	0	0	0	0	0	0	0	0	0	0	0	0	0	0	0	0	0	1	0	0	0	0	0	0	0	0	0	0	0	0	0	0	0	0	0	0	0	0	0	0	0	0
inter2x101	Conventional	S. haemolyticus	inter2x101_S142_L000_R1_001	0	1	0	0	0	0	0	0	0	0	0	0	0	0	0	0	0	0	0	0	0	1	0	0	0	0	0	0	0	0	0	0	0	0	1	0	0	0	0	0	0	0	0	0	0	0
inter2x102	Conventional	S. simulans	inter2x102_S143_L000_R1_001	0	1	0	0	0	0	0	0	0	0	0	0	0	0	0	0	0	0	0	0	0	0	0	0	0	0	0	0	0	0	0	0	0	0	0	0	0	0	0	0	0	1	1	0	0	1
inter2x103	Conventional	S. epidermidis	inter2x103_S144_L000_R1_001	0	0	0	0	0	1	0	1	0	0	0	0	0	0	0	0	1	0	0	0	0	1	0	0	0	0	0	0	0	0	0	0	0	0	0	0	0	1	0	1	0	1	0	0	0	1
inter2x104	Conventional	S. simulans	inter2x104_S145_L000_R1_001	0	1	0	0	0	0	0	0	0	0	0	0	0	0	0	0	0	0	0	0	0	0	0	0	0	0	0	0	0	0	0	0	0	0	0	0	0	0	0	0	1	1	1	0	0	1
inter2x105	Conventional	S. simulans	inter2x105_S146_L000_R1_001	0	0	0	0	0	0	0	0	0	0	0	0	0	0	0	0	0	0	0	0	0	0	0	0	0	0	0	0	0	0	0	0	0	1	0	0	0	0	0	0	0	1	1	0	0	1
inter2x107	Conventional	S. cohnii	inter2x107_S147_L000_R1_001	0	1	0	0	0	0	0	0	0	0	1	0	0	0	0	0	0	0	0	0	0	0	0	0	1	0	0	0	0	1	0	0	0	1	0	0	0	0	0	0	0	1	0	0	0	1
inter2x108	Conventional	S. simulans	inter2x108_S148_L000_R1_001	0	1	0	0	0	0	1	0	0	0	0	0	0	0	0	0	0	0	0	0	0	1	0	0	0	0	0	0	0	1	0	0	0	1	0	0	0	0	0	0	0	0	0	0	0	0
inter2x110	Conventional	S. cohnii	inter2x110_S149_L000_R1_001	0	0	0	0	0	0	0	0	0	0	1	0	0	0	0	0	0	0	0	0	0	1	0	0	1	0	0	0	1	0	0	0	0	0	0	1	0	0	1	0	0	1	0	0	0	0
inter2x111	Conventional	S. warneri	inter2x111_S150_L000_R1_001	0	0	0	0	0	0	0	0	0	0	0	0	0	0	0	0	0	0	0	0	0	1	0	0	0	0	0	0	0	1	0	0	0	1	0	0	0	0	0	0	0	1	1	1	0	1
inter2x114	Conventional	S. epidermidis	inter2x114_S151_L000_R1_001	0	0	0	0	0	0	1	1	0	0	0	0	0	0	0	0	0	0	0	0	0	0	0	0	0	0	0	0	0	0	0	0	0	1	0	0	0	1	0	0	0	1	0	0	0	0
inter2x115	Conventional	S. muscae	inter2x115_S152_L000_R1_001	0	0	0	0	0	0	0	0	0	0	0	0	0	0	0	0	1	0	0	0	0	0	0	0	0	0	0	0	0	0	0	0	0	0	0	1	0	0	0	0	0	0	0	0	0	0
inter2x116	Conventional	S. epidermidis	inter2x116_S153_L000_R1_001	0	0	0	0	0	0	1	1	0	0	0	1	0	0	0	0	0	0	0	0	0	0	0	0	0	0	0	0	0	0	0	0	0	0	0	0	0	1	0	0	0	1	0	0	0	1
inter2x117	Conventional	S. haemolyticus	inter2x117_S154_L000_R1_001	0	0	0	0	0	0	1	0	0	0	0	0	0	0	0	0	0	0	0	0	0	0	0	0	0	0	0	0	0	0	0	0	0	0	0	0	0	0	0	0	0	0	0	0	0	0
inter2x118	Conventional	S. simulans	inter2x118_S155_L000_R1_001	0	0	0	0	0	0	0	0	0	0	0	1	0	0	0	0	0	0	0	0	0	0	0	0	0	0	0	0	0	0	0	0	0	0	0	0	0	0	0	0	0	0	0	0	0	0
inter2x119	Conventional	S. simulans	inter2x119_S156_L000_R1_001	0	0	0	0	0	0	0	0	0	0	0	0	0	0	0	0	0	0	0	0	0	0	0	0	0	0	0	0	0	0	0	0	0	0	0	0	0	0	0	0	0	0	0	0	0	0
inter2x121	Conventional	S. warneri	inter2x121_S157_L000_R1_001	0	0	0	0	0	0	1	0	0	0	0	0	0	0	0	0	0	0	0	0	0	0	0	0	0	1	0	0	0	0	0	0	0	1	0	0	0	1	0	0	0	0	1	1	0	0
inter2x122	Conventional	S. epidermidis	inter2x122_S158_L000_R1_001	0	0	0	0	0	0	0	1	0	0	0	0	0	0	0	0	0	0	0	0	0	0	0	0	0	0	0	0	0	0	0	0	0	1	0	0	0	1	0	0	0	1	0	0	0	1
inter2x123	Conventional	S. epidermidis	inter2x123_S159_L000_R1_001	0	0	0	0	0	1	0	1	0	0	0	0	1	0	0	0	0	0	0	0	0	0	0	0	0	0	0	0	0	0	0	0	0	0	0	0	0	1	0	1	0	1	0	0	0	0
inter2x125	Conventional	S. epidermidis	inter2x125_S160_L000_R1_001	0	0	0	0	0	0	0	1	0	0	0	0	0	0	0	0	0	0	0	0	0	0	0	0	0	0	0	0	0	0	0	0	0	0	0	0	0	1	0	0	0	1	0	0	0	1
inter2x128	Conventional	S. hominis	inter2x128_S161_L000_R1_001	0	0	0	0	0	0	1	0	0	0	0	0	0	0	0	0	0	0	0	0	0	0	0	0	0	1	0	0	0	0	0	0	0	1	0	0	0	0	0	0	0	0	0	0	0	0
inter2x129	Conventional	S. warneri	inter2x129_S162_L000_R1_001	0	0	0	0	0	0	1	0	0	0	0	0	0	0	0	0	0	0	0	0	0	0	0	0	0	0	0	0	0	0	0	0	0	1	0	1	0	0	0	0	0	0	1	1	0	0
inter2x130	Conventional	S. warneri	inter2x130_S163_L000_R1_001	0	0	0	0	0	0	1	0	0	0	0	0	0	0	0	0	0	0	0	0	0	0	0	0	0	0	0	0	0	0	0	0	0	1	0	0	0	0	0	0	0	0	1	1	0	0
inter2x131	Conventional	S. pasteuri	inter2x131_S164_L000_R1_001	0	0	0	0	0	0	1	0	0	0	0	0	0	0	0	0	0	0	0	0	0	1	0	0	0	1	0	0	0	1	0	0	0	1	0	1	0	1	0	0	0	0	0	0	0	0
inter2x133	Conventional	S. epidermidis	inter2x133_S165_L000_R1_001	0	0	0	0	0	0	1	1	0	0	0	1	0	0	0	0	0	0	0	0	0	0	0	0	0	0	0	0	0	1	0	0	0	0	1	0	0	1	0	0	0	1	0	0	0	0
inter2x137	Conventional	S. simulans	inter2x137_S166_L000_R1_001	0	0	0	0	0	0	0	0	0	0	0	0	0	0	0	0	0	0	0	0	0	0	0	0	0	0	0	0	0	0	0	0	0	0	1	0	0	0	0	0	0	1	1	0	0	1
inter2x138	Conventional	S. simulans	inter2x138_S167_L000_R1_001	0	0	0	0	0	0	0	0	0	0	0	0	0	0	0	0	0	0	0	0	0	0	0	0	0	0	1	0	0	0	0	0	0	0	0	0	0	0	0	0	0	1	1	0	0	1
inter2x139	Conventional	S. pasteuri	inter2x139_S168_L000_R1_001	0	0	0	0	0	0	0	0	0	0	0	0	0	0	0	0	0	0	0	0	0	1	0	0	0	0	0	0	0	0	0	0	0	0	1	0	0	0	0	0	0	0	0	0	0	1
inter2x141	Conventional	S. cohnii	inter2x141_S169_L000_R1_001	0	0	0	0	0	0	1	0	0	0	1	1	0	0	0	0	0	0	0	0	0	0	0	0	1	0	0	0	0	0	0	0	0	1	0	0	0	0	0	0	0	1	1	1	0	1
inter2x142	Conventional	S. simulans	inter2x142_S170_L000_R1_001	0	0	0	0	0	0	0	0	0	0	0	0	0	0	0	0	0	0	0	0	0	1	0	0	0	0	0	0	0	0	0	0	0	0	0	0	0	0	0	0	0	1	1	0	0	1
inter2x144	Conventional	S. simulans	inter2x144_S171_L000_R1_001	0	0	0	0	0	0	0	0	0	0	0	1	0	0	0	0	0	0	0	0	0	1	0	0	0	0	0	0	0	1	0	0	0	1	1	0	0	0	0	0	0	1	1	0	0	1
inter2x145	Conventional	S. simulans	inter2x145_S172_L000_R1_001	0	0	0	0	0	0	0	0	0	0	0	0	0	0	0	0	0	0	0	0	0	1	0	0	0	0	0	0	0	0	0	0	0	1	0	0	0	0	0	0	0	1	1	0	0	1
inter2x146	Conventional	S. simulans	inter2x146_S173_L000_R1_001	0	0	0	0	0	0	0	0	0	0	0	1	0	0	0	0	0	0	0	0	0	1	0	0	0	0	0	0	0	1	0	0	0	1	0	0	0	0	0	0	0	0	0	0	0	0
inter2x147	Conventional	S. simulans	inter2x147_S174_L000_R1_001	0	0	0	0	0	0	0	0	0	0	0	0	0	0	0	0	0	0	0	0	0	1	0	0	0	0	0	0	0	1	0	0	0	1	0	0	0	0	0	0	0	1	1	0	0	1
inter2x148	Conventional	S. simulans	inter2x148_S175_L000_R1_001	0	0	0	0	0	0	0	0	0	0	0	0	0	0	0	0	0	0	0	0	0	0	0	0	0	0	0	0	0	0	0	0	0	0	0	0	0	0	0	0	0	1	1	0	0	1
inter2x150	Conventional	S. simulans	inter2x150_S176_L000_R1_001	0	0	0	0	0	0	0	0	0	0	0	0	0	0	0	0	0	0	0	0	0	1	0	0	0	0	0	0	0	0	0	0	0	1	0	0	0	0	0	0	0	1	1	0	0	1
inter2x151	Conventional	S. simulans	inter2x151_S177_L000_R1_001	0	0	0	1	0	0	0	0	0	0	0	1	0	0	0	0	0	0	0	0	1	1	0	0	0	0	0	0	0	0	0	0	0	1	0	0	0	0	0	0	0	0	0	0	0	0
inter2x152	Conventional	S. simulans	inter2x152_S178_L000_R1_001	0	0	0	0	0	0	0	0	0	0	0	0	0	0	0	0	0	0	0	0	0	1	0	0	0	0	0	0	0	0	0	0	0	1	0	0	0	0	0	0	0	1	1	0	0	1
inter2x309	Conventional	S. simulans	210531_21-06948_inter2x309_S35_L000_R1_001	0	0	1	1	0	0	0	0	0	0	0	0	0	1	1	0	0	0	0	0	0	0	0	0	0	0	0	0	0	0	1	0	0	0	0	0	0	0	0	0	0	1	1	0	0	1
inter2x310	Conventional	S. simulans	210531_21-06949_inter2x310_S36_L000_R1_001	0	0	0	0	0	0	0	0	0	0	0	1	0	0	0	0	0	0	0	0	0	0	0	0	0	0	0	0	0	0	0	0	0	0	0	0	0	0	0	0	0	0	0	0	0	0
inter2x311	Conventional	S. haemolyticus	210531_21-06950_inter2x311_S37_L000_R1_001	0	0	0	0	0	0	0	0	0	0	0	1	0	0	0	0	0	0	0	0	0	0	0	0	0	0	0	0	0	1	0	0	0	1	0	0	0	0	0	0	0	0	0	0	0	0
inter2x312	Conventional	S. haemolyticus	210531_21-06951_inter2x312_S38_L000_R1_001	0	0	0	0	0	0	0	0	0	0	0	0	0	0	0	0	0	0	0	0	0	0	0	0	0	0	0	0	0	1	0	0	0	1	0	0	0	0	0	0	0	0	0	0	0	0
inter2x313	Conventional	S. simulans	210531_21-06952_inter2x313_S39_L000_R1_001	0	0	1	0	0	0	0	0	0	0	0	0	0	1	1	0	0	0	0	0	0	0	0	0	0	0	0	0	0	0	1	0	0	1	0	0	0	0	0	0	0	1	1	0	0	1
inter2x314	Conventional	S. haemolyticus	210531_21-06953_inter2x314_S40_L000_R1_001	0	0	0	0	0	0	0	0	0	0	0	0	0	0	0	0	0	1	0	0	0	0	0	0	0	0	0	0	0	1	0	0	0	0	0	0	0	0	1	0	0	1	1	0	0	1
inter2x316	Conventional	S. hominis	210531_21-06954_inter2x316_S41_L000_R1_001	0	0	0	0	0	0	0	0	0	0	0	0	0	0	0	0	0	0	0	0	0	0	0	0	0	0	0	0	0	0	0	0	0	0	0	0	0	0	0	0	0	0	0	0	0	0
inter2x317	Conventional	S. haemolyticus	210531_21-06955_inter2x317_S42_L000_R1_001	0	0	0	0	0	0	0	0	0	0	0	0	0	0	0	0	0	0	0	0	0	0	0	0	0	0	0	0	0	0	0	0	0	0	0	0	0	0	0	0	0	1	1	1	0	1
inter2x318	Conventional	S. chromogenes	210531_21-06956_inter2x318_S43_L000_R1_001	0	0	0	0	0	0	1	0	0	0	0	0	0	0	0	0	0	0	0	0	0	0	0	0	0	0	0	0	0	0	0	0	0	0	0	0	0	0	0	0	0	1	1	0	0	0
inter2x319	Conventional	S. cohnii	210531_21-06957_inter2x319_S44_L000_R1_001	0	0	0	0	0	0	0	0	0	0	0	0	0	0	0	0	0	0	0	0	0	1	0	0	0	0	0	0	1	0	0	0	0	1	0	0	0	0	1	0	0	0	1	0	0	0
inter2x320	Conventional	S. xylosus	210531_21-06958_inter2x320_S45_L000_R1_001	0	0	0	0	0	0	0	0	0	0	0	0	0	0	0	0	0	0	0	0	0	0	0	0	0	0	0	0	0	0	0	0	0	0	0	0	0	0	0	0	0	1	1	0	0	0
inter2x321	Conventional	S. cohnii	210531_21-06959_inter2x321_S46_L000_R1_001	0	0	0	0	0	0	0	0	0	0	1	0	0	0	0	0	0	0	0	0	0	1	0	0	1	0	1	0	1	1	0	0	0	0	0	0	0	0	1	0	0	1	0	0	0	1
inter2x323	Conventional	S. simulans	210531_21-06960_inter2x323_S47_L000_R1_001	0	0	0	0	0	0	0	0	0	0	0	0	0	0	0	0	0	0	0	0	0	0	0	0	0	0	0	0	0	0	0	0	0	1	0	0	0	0	0	0	0	0	0	0	0	1
inter2x324	Conventional	S. haemolyticus	210531_21-06961_inter2x324_S48_L000_R1_001	0	0	0	0	0	0	0	0	0	0	0	0	0	0	0	0	0	0	0	0	0	0	0	0	0	0	0	0	0	0	0	0	0	0	1	0	0	0	0	0	0	0	0	0	0	1
inter2x325	Conventional	S. pasteuri	210531_21-06962_inter2x325_S49_L000_R1_001	0	0	0	0	0	0	1	0	0	0	0	0	0	0	0	0	0	0	0	0	0	0	0	0	0	1	0	0	0	0	0	0	0	1	0	0	0	1	0	0	0	1	1	0	0	0
inter2x326	Conventional	S. pasteuri	210531_21-06963_inter2x326_S50_L000_R1_001	0	0	0	0	0	0	0	0	0	0	0	0	0	0	0	0	0	0	0	0	0	0	0	0	0	0	0	0	0	0	0	0	0	0	0	0	0	0	0	0	0	0	0	0	0	1
inter2x327	Conventional	S. simulans	210531_21-06964_inter2x327_S51_L000_R1_001	0	0	0	0	0	0	0	0	0	0	0	0	0	0	0	0	0	0	0	0	0	1	0	0	0	0	0	0	0	1	0	0	0	0	0	0	0	0	0	0	0	1	1	0	0	1
inter2x328	Conventional	S. simulans	210531_21-06965_inter2x328_S52_L000_R1_001	0	0	0	1	0	0	0	0	0	0	0	0	0	0	0	0	0	0	0	0	1	0	0	0	0	0	0	0	0	0	0	0	0	0	0	0	0	0	0	0	0	1	1	0	0	1
inter2x329	Conventional	S. simulans	210531_21-06966_inter2x329_S53_L000_R1_001	0	0	0	0	0	0	0	0	0	0	0	0	0	0	0	0	1	0	0	0	0	1	0	0	0	0	0	0	0	0	0	0	0	0	1	0	0	0	0	0	0	1	1	0	0	1
inter2x330	Conventional	S. simulans	210531_21-06967_inter2x330_S54_L000_R1_001	0	0	0	0	0	0	0	0	0	0	0	0	0	0	0	0	0	0	0	0	0	0	0	0	0	0	0	0	0	0	0	0	0	0	0	0	0	0	0	0	0	1	1	0	0	1
inter2x331	Conventional	S. simulans	210531_21-06968_inter2x331_S55_L000_R1_001	0	0	0	0	0	0	0	0	0	0	0	0	0	0	0	0	0	0	0	0	0	0	0	0	0	0	0	0	0	0	0	0	0	0	0	0	0	0	0	0	0	1	1	0	0	1
inter2x332	Conventional	S. simulans	210531_21-06969_inter2x332_S56_L000_R1_001	0	0	0	0	0	0	0	0	0	0	0	0	0	0	0	0	0	0	0	0	0	0	0	0	0	0	0	0	0	0	0	0	0	0	0	0	0	0	0	0	0	1	1	0	0	1
inter2x333	Conventional	S. haemolyticus	210531_21-06970_inter2x333_S57_L000_R1_001	0	0	0	0	0	0	0	0	0	0	0	0	0	0	0	0	0	0	0	0	0	0	0	0	0	0	0	0	0	0	0	0	0	0	0	0	0	0	0	0	0	1	1	1	0	0
inter2x334	Conventional	S. haemolyticus	210531_21-06971_inter2x334_S58_L000_R1_001	0	0	0	0	0	0	0	0	0	0	0	0	0	0	0	0	0	0	0	0	0	0	0	0	0	0	0	0	0	0	0	0	0	0	0	0	0	0	0	0	0	1	1	1	0	0
inter2x335	Conventional	S. haemolyticus	210531_21-06972_inter2x335_S59_L000_R1_001	0	0	0	0	0	0	0	0	0	0	0	0	0	0	0	0	0	0	0	0	0	0	0	0	0	0	0	0	0	0	0	0	0	0	0	0	0	0	0	0	0	0	0	0	0	1
inter2x336	Conventional	S. haemolyticus	210531_21-06973_inter2x336_S60_L000_R1_001	0	0	0	0	0	0	0	0	0	0	0	0	0	0	0	0	0	0	0	0	0	0	0	0	0	0	0	0	0	0	0	0	0	0	0	0	0	0	0	0	0	0	0	0	0	0
inter2x338	Conventional	S. chromogenes	210531_21-06974_inter2x338_S61_L000_R1_001	0	0	0	0	0	0	0	0	0	0	0	0	0	0	0	0	0	0	0	0	0	0	0	0	0	0	0	0	0	0	0	0	0	0	0	0	0	0	0	0	0	1	1	0	0	0
inter2x339	Conventional	S. hominis	210531_21-06975_inter2x339_S62_L000_R1_001	0	0	0	0	0	0	1	0	0	0	0	0	0	0	0	0	0	0	0	0	0	0	0	0	0	1	0	0	0	0	0	0	0	0	0	0	0	0	0	0	0	0	0	0	0	0
inter2x340	Conventional	S. simulans	210531_21-06976_inter2x340_S63_L000_R1_001	0	0	0	0	0	0	0	0	0	0	0	0	0	0	0	0	0	0	0	0	0	1	0	0	0	0	0	0	0	0	0	0	0	0	0	0	0	0	0	0	1	0	0	0	0	1
inter2x341	Conventional	S. pasteuri	210531_21-06977_inter2x341_S64_L000_R1_001	0	1	0	0	0	0	1	0	0	0	0	0	0	0	0	0	0	0	0	0	0	0	0	0	0	0	0	0	0	0	0	0	0	0	1	0	0	1	0	0	0	0	0	0	0	0
inter2x342	Conventional	S. pasteuri	210531_21-06978_inter2x342_S65_L000_R1_001	0	1	0	0	0	0	1	0	0	0	0	0	0	0	0	0	0	1	0	0	0	0	0	0	0	1	0	0	0	0	0	0	0	0	1	1	0	1	0	0	1	0	0	0	0	0
inter2x343	Conventional	S. pasteuri	210531_21-06979_inter2x343_S66_L000_R1_001	0	0	0	0	0	0	0	0	0	0	0	0	0	0	0	0	0	0	0	0	0	0	0	0	0	0	0	0	0	0	0	0	0	0	0	0	0	1	0	0	0	0	0	0	0	0
inter2x344	Conventional	S. pasteuri	210531_21-06980_inter2x344_S67_L000_R1_001	0	1	0	0	0	0	1	0	0	0	0	0	0	0	0	0	1	0	0	0	0	0	0	0	0	0	0	0	0	0	0	0	0	0	1	1	0	1	0	0	0	0	0	0	0	0
inter2x345	Conventional	S. pasteuri	210531_21-06981_inter2x345_S68_L000_R1_001	0	0	0	0	0	0	1	0	0	0	0	0	0	0	0	0	0	0	0	0	0	0	0	0	0	0	0	0	0	0	0	0	0	1	0	1	0	1	0	0	0	0	0	0	0	0
inter2x351	Conventional	S. piscifermentans	210531_21-06983_inter2x351_S70_L000_R1_001	0	1	0	0	0	0	0	0	0	0	0	0	0	0	0	0	0	0	0	0	0	1	0	0	0	0	0	0	0	0	0	0	0	0	1	0	0	0	0	0	1	1	1	0	0	0
inter2x355	Conventional	S. piscifermentans	210531_21-06986_inter2x355_S73_L000_R1_001	0	0	0	1	0	0	0	0	0	0	0	0	0	0	0	0	0	0	0	0	1	1	0	0	0	0	1	0	0	0	0	0	0	1	0	0	0	0	0	0	0	1	1	0	0	0
inter2x379	Conventional	S. simulans	inter2x379_S164_L000_R1_001	0	0	0	0	0	1	0	0	0	0	0	0	0	0	0	0	0	0	0	0	0	0	0	0	0	0	0	0	0	0	0	0	0	1	0	0	0	0	0	0	0	0	0	0	0	1
inter2x380	Conventional	S. simulans	inter2x380_S165_L000_R1_001	0	0	0	0	0	0	0	0	0	0	0	0	0	0	0	0	0	0	0	0	0	0	0	0	0	0	0	0	0	0	0	0	0	0	0	0	0	0	0	0	0	1	1	0	0	1
inter2x381	Conventional	S. simulans	inter2x381_S166_L000_R1_001	0	0	0	0	0	1	0	0	0	0	0	0	0	0	0	0	0	0	0	0	0	0	0	0	0	0	0	0	0	0	0	0	0	0	0	0	0	0	0	1	0	1	1	1	0	0
inter2x382	Conventional	S. pasteuri	inter2x382_S167_L000_R1_001	0	0	0	0	0	0	0	0	0	0	0	0	1	0	0	0	1	0	0	0	0	1	0	0	0	1	0	0	0	0	0	0	0	0	0	0	0	1	0	0	0	0	0	0	0	0
inter2x011	Alternative	S. simulans	inter2x011_S71_L000_R1_001	0	0	1	0	0	0	0	0	0	0	0	0	0	1	1	0	0	0	0	0	0	0	0	0	0	0	0	0	0	0	1	0	0	1	0	0	0	0	0	0	0	1	1	0	0	1
inter2x012	Alternative	S. cohnii	inter2x012_S72_L000_R1_001	0	0	0	0	0	0	0	0	0	0	1	0	0	0	0	0	0	0	0	0	0	0	0	0	1	0	0	0	0	0	0	0	0	1	0	0	0	0	0	0	0	1	1	1	0	0
inter2x014	Alternative	S. cohnii	inter2x014_S73_L000_R1_001	0	0	0	0	0	0	0	0	0	0	1	0	0	0	0	0	0	0	0	0	0	0	0	0	1	0	1	0	1	0	0	0	0	1	0	0	0	0	0	0	0	1	1	1	0	0
inter2x017	Alternative	S. simulans	inter2x017_S74_L000_R1_001	0	0	0	0	0	0	0	0	0	0	0	0	0	0	0	0	0	0	0	0	0	0	0	0	0	0	0	0	0	0	0	0	0	0	0	0	0	0	0	0	0	0	0	0	0	0
inter2x019	Alternative	S. simulans	inter2x019_S75_L000_R1_001	0	0	1	0	0	0	0	0	0	0	0	0	0	1	1	0	0	0	0	0	0	0	0	0	0	0	0	0	0	0	1	0	0	1	0	0	0	0	0	0	0	1	1	0	0	1
inter2x020	Alternative	S. simulans	inter2x020_S76_L000_R1_001	0	0	0	0	0	0	0	0	0	0	0	0	0	0	0	0	0	0	0	0	0	0	0	0	0	0	0	0	0	0	0	0	0	0	0	0	0	0	0	0	0	0	0	0	0	0
inter2x021	Alternative	S. saprophyticus	inter2x021_S77_L000_R1_001	0	0	0	0	0	0	0	0	1	1	0	0	0	0	0	0	0	0	0	0	0	0	0	0	0	0	1	0	0	0	0	0	0	1	0	0	0	0	0	0	0	0	1	0	0	1
inter2x022	Alternative	S. simulans	inter2x022_S78_L000_R1_001	0	0	0	0	0	0	1	0	0	0	0	0	0	0	0	0	0	0	0	0	0	1	0	0	0	0	0	0	0	0	0	0	0	0	0	0	0	0	0	0	0	0	0	0	0	0
inter2x154	Alternative	S. arlettae	inter2x154_S179_L000_R1_001	0	0	0	0	1	0	0	0	0	0	0	1	0	0	0	0	0	0	0	0	0	0	0	0	0	0	0	0	1	0	0	0	0	1	0	0	0	0	0	0	0	1	1	0	0	1
inter2x156	Alternative	S. cohnii	inter2x156_S180_L000_R1_001	0	0	0	0	0	0	0	0	0	0	1	0	0	0	0	0	0	0	0	0	0	0	0	0	1	0	0	0	0	0	0	0	0	1	0	0	0	0	0	0	0	1	1	0	0	1
inter2x158	Alternative	S. cohnii	inter2x158_S181_L000_R1_001	0	0	0	0	0	0	0	0	0	0	1	0	0	0	0	0	0	0	0	0	0	0	0	0	1	0	0	0	0	0	0	0	0	0	0	0	0	0	0	0	0	1	1	1	0	1
inter2x164	Alternative	S. simulans	inter2x164_S182_L000_R1_001	0	0	0	0	0	0	1	0	0	0	0	0	0	0	0	0	0	0	0	0	0	0	0	0	0	0	0	0	0	0	0	0	0	0	0	0	0	0	0	0	0	0	0	0	0	0
inter2x166	Alternative	S. xylosus	inter2x166_S183_L000_R1_001	0	0	0	0	0	0	0	0	0	0	0	0	0	0	0	0	0	0	0	0	0	0	0	0	0	0	0	0	0	0	0	0	0	0	0	0	0	0	0	0	0	1	1	0	0	0
inter2x167	Alternative	S. simulans	inter2x167_S184_L000_R1_001	0	0	0	0	0	0	0	0	0	0	0	0	0	0	0	0	0	0	0	0	0	0	0	0	0	0	0	0	0	0	0	0	0	0	0	0	0	0	0	0	0	0	0	0	0	0
inter2x169	Alternative	S. chromogenes	inter2x169__S185_L000_R1_001	0	0	0	0	0	0	1	0	0	0	0	0	0	0	0	0	0	0	0	0	0	0	0	0	0	0	0	0	0	0	0	0	0	0	0	0	0	0	0	0	0	1	1	0	0	0
inter2x170	Alternative	S. chromogenes	inter2x170__S186_L000_R1_001	0	0	0	0	0	0	0	0	0	0	0	0	0	0	0	0	0	0	0	0	0	0	0	0	0	0	0	0	0	0	0	0	0	0	0	0	0	0	0	0	0	1	1	0	0	0
inter2x172	Alternative	S. chromogenes	inter2x172__S187_L000_R1_001	0	0	0	0	0	0	1	0	0	0	0	0	0	0	0	0	0	0	0	0	0	0	0	0	0	0	0	0	0	0	0	0	0	0	0	0	0	0	0	0	0	1	1	0	0	0
inter2x178	Alternative	S. arlettae	inter2x178_S188_L000_R1_001	0	0	0	0	1	0	0	0	0	0	0	0	0	0	0	0	0	0	0	0	0	0	0	0	0	0	0	0	0	0	0	0	0	0	0	0	0	0	0	0	0	1	1	0	0	0
inter2x186	Alternative	S. epidermidis	inter2x186_S190_L000_R1_001	0	0	0	0	0	0	0	1	0	0	0	0	0	0	0	0	0	0	0	0	0	0	0	0	0	0	0	1	0	0	0	1	1	1	0	0	1	1	0	0	0	1	0	0	0	1
inter2x188	Alternative	M. lentus	inter2x188_S191_L000_R1_001	0	0	0	0	0	0	0	0	0	0	0	0	0	0	0	0	0	0	0	0	0	0	0	1	0	0	0	0	0	0	0	0	0	0	0	0	0	0	0	0	0	1	1	0	0	0
inter2x191	Alternative	M. lentus	inter2x191_S192_L000_R1_001	0	0	0	0	0	0	0	0	0	0	0	0	0	0	0	0	0	0	0	0	0	0	0	1	0	0	0	0	0	0	0	0	0	0	0	0	0	0	0	0	0	1	1	0	0	0
inter2x195	Alternative	M. lentus	inter2x195_S193_L000_R1_001	0	0	0	0	0	0	0	0	0	0	0	0	0	0	0	0	0	0	0	0	0	0	0	1	0	0	0	0	0	0	0	0	0	0	0	0	0	0	0	0	0	0	0	0	0	0
inter2x197	Alternative	S. epidermidis	inter2x197_S194_L000_R1_001	0	1	1	0	0	1	0	1	0	0	0	0	0	1	1	0	0	0	0	0	0	0	0	0	0	1	0	0	0	0	1	0	0	0	0	0	0	1	0	1	0	1	0	0	0	0
inter2x200	Alternative	S. simulans	inter2x200_S195_L000_R1_001	0	0	0	0	0	0	0	0	0	0	0	0	0	0	0	0	0	0	0	0	0	0	0	0	0	0	0	0	0	0	0	0	0	0	0	0	0	0	0	0	0	0	0	0	0	0
inter2x207	Alternative	S. chromogenes	inter2x207_S196_L000_R1_001	0	0	0	0	0	0	1	0	0	0	0	0	0	0	0	0	0	0	0	0	0	0	0	0	0	0	0	0	0	0	0	0	0	1	0	0	0	0	0	0	0	1	1	0	0	0
inter2x211	Alternative	S. simulans	inter2x211_S197_L000_R1_001	0	0	0	0	0	0	0	0	0	0	0	0	0	0	0	0	0	0	0	0	0	0	0	0	0	0	0	0	0	0	0	0	0	0	0	0	0	0	0	0	0	0	0	0	0	0
inter2x213	Alternative	S. simulans	inter2x213_S198_L000_R1_001	0	0	0	0	0	0	0	0	0	0	0	0	0	0	0	0	0	0	0	0	0	0	0	0	0	0	1	0	0	0	0	0	0	0	0	0	0	0	0	0	0	1	1	0	0	1
inter2x214	Alternative	S. simulans	inter2x214_S199_L000_R1_001	0	0	0	1	0	0	0	0	0	0	0	0	0	0	0	0	0	0	0	0	1	0	0	0	0	0	0	0	0	0	0	0	0	0	0	0	0	0	0	0	0	0	0	0	0	0
inter2x215	Alternative	S. simulans	inter2x215_S200_L000_R1_001	0	0	0	1	0	0	0	0	0	0	0	0	0	0	0	0	0	0	1	0	1	0	0	0	0	0	1	0	0	0	0	0	0	0	0	0	0	0	0	0	0	0	0	0	0	0
inter2x216	Alternative	S. simulans	inter2x216_S201_L000_R1_001	0	0	0	1	0	0	0	0	0	0	0	0	0	0	0	0	0	0	0	0	1	0	0	0	0	0	0	0	0	0	0	0	0	0	0	0	0	0	0	0	0	1	1	0	0	1
inter2x217	Alternative	S. pasteuri	inter2x217_S202_L000_R1_001	0	0	0	0	0	0	0	0	0	0	0	0	0	0	0	0	0	0	0	0	0	0	0	0	0	0	0	0	0	0	0	0	0	0	0	0	0	0	0	0	0	0	0	0	0	1
inter2x218	Alternative	S. chromogenes	inter2x218_S203_L000_R1_001	0	0	0	0	0	0	1	0	0	0	0	0	0	0	0	0	0	0	0	0	0	0	0	0	0	0	0	0	0	0	0	0	0	0	0	0	0	0	0	0	0	1	1	0	0	0
inter2x219	Alternative	S. simulans	inter2x219_S204_L000_R1_001	0	0	0	0	0	0	0	0	0	0	0	0	0	0	0	0	0	0	0	0	0	0	0	0	0	0	0	0	0	0	0	0	0	1	0	0	0	0	0	0	0	0	0	0	0	0
inter2x224	Alternative	S. simulans	inter2x224_S205_L000_R1_001	0	0	0	0	0	0	0	0	0	0	0	0	0	0	0	0	0	0	0	0	0	0	0	0	0	0	0	0	0	0	0	0	0	0	0	0	0	0	0	0	0	0	0	0	0	0
inter2x230	Alternative	S. simulans	inter2x230_S206_L000_R1_001	0	0	0	0	0	0	0	0	0	0	0	0	0	0	0	0	0	0	0	0	0	0	0	0	0	0	0	0	0	0	0	0	0	0	0	0	0	0	0	0	0	1	1	0	0	1
inter2x231	Alternative	S. simulans	inter2x231_S207_L000_R1_001	0	0	0	0	0	0	0	0	0	0	0	0	0	0	0	0	0	0	0	0	0	0	0	0	0	0	0	0	0	0	0	0	0	0	0	0	0	0	0	0	0	1	1	0	0	1
inter2x233	Alternative	S. xylosus	inter2x233_S208_L000_R1_001	0	0	0	0	0	0	0	0	0	0	0	0	0	0	0	0	0	0	0	0	0	0	0	0	0	0	0	0	0	0	0	0	0	0	0	0	0	0	0	0	0	1	1	0	0	1
inter2x234	Alternative	S. simulans	inter2x234_S209_L000_R1_001	0	0	0	0	0	0	0	0	0	0	0	0	0	0	0	0	0	0	0	0	0	0	0	0	0	0	0	0	0	0	0	0	0	0	0	0	0	0	0	0	0	0	0	0	0	0
inter2x240	Alternative	S. simulans	inter2x240_S210_L000_R1_001	0	0	0	0	0	0	0	0	0	0	0	0	0	0	0	0	0	0	0	0	0	0	0	0	0	0	0	0	0	0	0	0	0	0	0	0	0	0	0	0	0	1	1	0	0	1
inter2x242	Alternative	S. haemolyticus	inter2x242_S211_L000_R1_001	0	0	0	0	0	0	0	0	0	0	0	0	0	0	0	0	0	0	0	0	0	0	0	0	0	0	0	0	0	0	0	0	0	0	0	0	0	0	0	0	0	0	0	0	0	0
inter2x243	Alternative	S. simulans	inter2x243_S212_L000_R1_001	0	0	0	0	0	0	0	0	0	0	0	0	0	0	0	0	0	0	0	0	0	0	0	0	0	0	0	0	0	0	0	0	0	0	0	0	0	0	0	0	0	0	0	0	0	0
inter2x350	Alternative	S. simulans	210531_21-06982_inter2x350_S69_L000_R1_001	0	0	0	0	0	0	0	0	0	0	0	0	0	0	0	0	0	0	0	0	0	0	0	0	0	0	0	0	0	0	0	0	0	0	0	0	0	0	0	0	0	0	0	0	0	0
inter2x352	Alternative	S. simulans	210531_21-06984_inter2x352_S71_L000_R1_001	0	0	0	0	0	0	0	0	0	0	0	0	0	0	0	0	0	0	0	0	0	0	0	0	0	0	0	0	0	0	0	0	0	0	0	0	0	0	0	0	0	0	0	0	0	0
inter2x353	Alternative	S. simulans	210531_21-06985_inter2x353_S72_L000_R1_001	0	0	0	0	0	0	0	0	0	0	0	0	0	0	0	0	0	0	0	0	0	0	0	0	0	0	0	0	0	0	0	0	0	0	0	0	0	0	0	0	0	0	0	0	0	0
inter2x357	Alternative	S. warneri	210531_21-06987_inter2x357_S74_L000_R1_001	0	0	0	0	0	0	1	0	0	0	0	0	0	0	0	0	1	0	0	0	0	0	0	0	0	0	0	0	0	0	0	0	0	0	0	0	0	0	0	0	0	0	1	1	0	0
inter2x359	Alternative	S. simulans	210531_21-06988_inter2x359_S75_L000_R1_001	0	0	0	0	0	0	0	0	0	0	0	0	0	0	0	0	0	0	0	0	0	0	0	0	0	0	0	0	0	0	0	0	0	0	0	0	0	0	0	0	0	1	1	0	0	1
inter2x360	Alternative	S. simulans	inter2x360_S151_L000_R1_001	0	0	0	0	0	0	0	0	0	0	0	0	0	0	0	0	0	0	0	0	0	0	0	0	0	0	0	0	0	0	0	0	0	1	0	0	0	0	0	0	0	0	0	0	0	0
inter2x361	Alternative	S. simulans	inter2x361_S152_L000_R1_001	0	0	0	0	0	0	0	0	0	0	0	0	0	0	0	0	0	0	0	0	0	0	0	0	0	0	0	0	0	0	0	0	0	0	0	0	0	0	0	0	0	1	1	0	0	1
inter2x363	Alternative	S. haemolyticus	inter2x363_S153_L000_R1_001	0	0	0	0	0	0	0	0	0	0	0	0	0	0	0	0	0	0	0	0	0	0	0	0	0	0	0	0	0	0	0	0	0	0	0	0	0	0	0	0	0	0	0	0	0	0
inter2x369	Alternative	S. xylosus	inter2x369_S158_L000_R1_001	0	0	0	0	0	0	0	0	0	0	0	0	0	0	0	0	0	0	0	0	0	0	0	0	0	0	0	0	0	0	0	0	0	0	0	0	0	0	0	0	0	1	1	1	0	0
inter2x370	Alternative	S. epidermidis	inter2x370_S159_L000_R1_001	0	0	0	0	0	0	1	1	0	0	0	0	1	0	0	0	0	0	0	0	0	0	0	0	0	0	0	0	0	0	0	0	0	0	0	0	0	1	0	1	0	1	0	0	0	0
inter2x375	Alternative	S. simulans	inter2x375_S161_L000_R1_001	0	0	0	1	0	0	1	0	0	0	0	0	0	0	0	0	0	0	0	0	1	0	0	0	0	0	0	0	0	0	0	0	0	0	0	0	0	0	0	0	0	0	0	0	0	0
inter2x376	Alternative	S. chromogenes	inter2x376_S162_L000_R1_001	0	0	0	0	0	0	1	0	0	0	0	0	0	0	0	0	1	0	0	0	0	0	0	0	0	0	0	0	0	0	0	0	0	0	0	0	0	0	0	0	0	1	1	0	0	0
inter2x384	Alternative	S. simulans	inter2x384_S169_L000_R1_001	0	0	0	0	0	0	0	0	0	0	0	0	1	0	0	0	0	0	0	0	0	0	0	0	0	0	0	0	0	0	0	0	0	0	0	0	0	0	0	0	0	0	0	0	0	1
inter2x245	Organic	S. simulans	inter2x245_S213_L000_R1_001	0	0	0	0	0	0	0	0	0	0	0	0	0	0	0	0	0	0	0	0	0	0	0	0	0	0	0	0	0	0	0	0	0	0	0	0	0	0	0	0	1	1	1	0	0	1
inter2x246	Organic	S. simulans	inter2x246_S214_L000_R1_001	0	0	0	0	0	0	0	0	0	0	0	0	0	0	0	0	1	0	0	0	0	0	0	0	0	0	0	0	0	0	0	0	0	0	0	0	0	0	0	0	0	1	1	0	0	1
inter2x247	Organic	S. simulans	inter2x247_S215_L000_R1_001	0	0	0	0	0	0	0	0	0	0	0	0	0	0	0	0	0	0	0	0	0	1	0	0	0	0	0	0	0	0	0	0	0	0	0	0	0	0	0	0	0	1	1	0	0	1
inter2x248	Organic	S. simulans	210531_21-06914_inter2x248_S1_L000_R1_001	0	0	0	0	0	0	0	0	0	0	0	0	0	0	0	0	1	0	0	0	0	0	0	0	0	0	0	0	0	0	0	0	0	0	0	0	0	0	0	0	0	1	1	0	0	1
inter2x250	Organic	S. simulans	210531_21-06915_inter2x250_S2_L000_R1_001	0	0	0	0	0	0	0	0	0	0	0	0	0	0	0	0	0	0	0	0	0	0	0	0	0	0	0	0	0	0	0	0	0	0	0	0	0	0	0	0	1	1	1	0	0	1
inter2x256	Organic	S. xylosus	210531_21-06916_inter2x256_S3_L000_R1_001	0	0	0	0	0	0	0	0	0	0	0	0	0	0	0	0	0	0	0	0	0	0	0	0	0	0	0	0	0	0	0	0	0	0	0	0	0	0	0	0	0	1	1	1	0	1
inter2x257	Organic	S. xylosus	210531_21-06917_inter2x257_S4_L000_R1_001	0	0	0	0	0	0	0	0	0	0	0	0	0	0	0	0	0	0	0	0	0	0	0	0	0	0	0	0	0	0	0	0	0	0	0	0	0	0	0	0	0	1	1	1	0	0
inter2x258	Organic	S. xylosus	210531_21-06918_inter2x258_S5_L000_R1_001	0	0	0	0	0	0	0	0	0	0	0	0	0	0	0	0	0	0	0	0	0	0	0	0	0	0	0	0	0	0	0	0	0	0	0	0	0	0	0	0	0	1	1	0	0	0
inter2x261	Organic	S. xylosus	210531_21-06920_inter2x261_S7_L000_R1_001	0	0	0	0	0	0	0	0	0	0	0	0	0	0	0	0	0	0	0	0	0	0	0	0	0	0	0	0	0	0	0	0	0	0	0	0	0	0	0	0	0	1	1	0	0	1
inter2x262	Organic	S. xylosus	210531_21-06921_inter2x262_S8_L000_R1_001	0	0	0	0	0	0	0	0	0	0	0	0	0	0	0	0	0	0	0	0	0	0	0	0	0	0	0	0	0	0	0	0	0	0	0	0	0	0	0	0	0	1	1	0	0	1
inter2x263	Organic	S. xylosus	210531_21-06922_inter2x263_S9_L000_R1_001	0	0	0	0	0	0	0	0	0	0	0	0	0	0	0	0	0	0	0	0	0	0	0	0	0	0	0	0	0	0	0	0	0	0	0	0	0	0	0	0	0	1	1	0	0	1
inter2x265	Organic	S. xylosus	210531_21-06923_inter2x265_S10_L000_R1_001	0	0	0	0	0	0	0	0	0	0	0	1	0	0	0	0	0	0	0	0	0	0	0	0	0	0	0	0	0	0	0	0	0	1	0	0	0	0	0	0	0	1	0	1	0	1
inter2x266	Organic	M. Sciuri	210531_21-06924_inter2x266_S11_L000_R1_001	0	0	0	0	0	0	0	0	0	0	0	0	0	0	0	1	0	0	0	0	0	0	0	0	0	0	0	0	0	0	0	0	0	0	0	0	0	0	0	0	0	1	1	0	1	1
inter2x271	Organic	S. xylosus	210531_21-06925_inter2x271_S12_L000_R1_001	0	0	0	0	0	0	0	0	1	0	0	1	0	0	0	0	0	0	0	0	0	0	0	0	0	0	0	0	0	0	0	0	0	0	0	0	0	0	0	0	0	1	1	0	0	1
inter2x272	Organic	S. xylosus	210531_21-06926_inter2x272_S13_L000_R1_001	0	0	0	0	0	0	0	0	0	0	0	0	0	0	0	0	0	0	0	0	0	0	0	0	0	0	0	0	0	0	0	0	0	0	0	0	0	0	0	0	0	1	1	0	0	0
inter2x274	Organic	S. xylosus	210531_21-06927_inter2x274_S14_L000_R1_001	0	0	0	0	0	0	0	0	0	0	0	0	0	0	0	0	0	0	0	0	0	0	0	0	0	0	0	0	0	0	0	0	0	0	0	0	0	0	0	0	0	1	1	0	0	0
inter2x278	Organic	S. simulans	210531_21-06929_inter2x278_S16_L000_R1_001	0	0	0	0	0	0	0	0	0	0	0	0	0	0	0	0	0	0	0	0	0	0	0	0	0	0	0	0	0	0	0	0	0	0	0	0	0	0	0	0	0	0	0	0	0	0
inter2x279	Organic	S. cohnii	210531_21-06930_inter2x279_S17_L000_R1_001	0	0	0	0	0	0	0	0	0	0	1	0	0	0	0	0	1	0	0	0	0	0	0	0	1	0	0	0	0	0	0	0	0	0	0	0	0	0	0	0	0	1	1	0	0	1
inter2x280	Organic	S. simulans	210531_21-06931_inter2x280_S18_L000_R1_001	0	0	0	0	0	0	0	0	0	0	0	0	0	0	0	0	0	0	0	0	0	0	0	0	0	0	0	0	0	0	0	0	0	0	0	0	0	0	0	0	0	0	0	0	0	0
inter2x281	Organic	M. lentus	210531_21-06932_inter2x281_S19_L000_R1_001	0	0	0	0	0	0	0	0	0	0	0	0	0	0	0	0	0	0	0	0	0	0	0	1	0	0	0	0	0	0	0	0	0	0	0	0	0	0	0	0	0	1	1	0	0	1
inter2x285	Organic	S. simulans	210531_21-06934_inter2x285_S21_L000_R1_001	0	0	0	0	0	0	0	0	0	0	0	0	1	0	0	0	0	0	0	0	0	0	0	0	0	0	0	0	0	0	0	0	0	0	0	0	0	0	0	0	0	0	0	0	0	0
inter2x286	Organic	S. simulans	210531_21-06935_inter2x286_S22_L000_R1_001	0	0	0	0	0	0	0	0	0	0	0	1	0	0	0	0	0	0	0	0	0	0	0	0	0	0	0	0	0	0	0	0	0	0	0	0	0	0	0	0	0	0	0	0	0	0
inter2x287	Organic	S. simulans	210531_21-06936_inter2x287_S23_L000_R1_001	0	0	0	0	0	1	0	0	0	0	0	0	0	0	0	0	0	0	0	0	0	0	0	0	0	0	0	0	0	0	0	0	0	0	0	0	0	0	0	0	0	0	0	0	0	0
inter2x288	Organic	S. xylosus	210531_21-06937_inter2x288_S24_L000_R1_001	0	0	0	0	0	0	0	0	0	0	0	0	0	0	0	0	0	0	0	0	0	0	0	0	0	0	0	0	0	0	0	0	0	0	0	0	0	0	0	0	0	0	1	1	0	0
inter2x289	Organic	M. lentus	210531_21-06938_inter2x289_S25_L000_R1_001	0	0	0	0	0	0	0	0	0	0	0	0	0	0	0	0	0	0	0	1	0	0	0	1	0	0	0	0	0	0	0	0	0	0	0	1	0	0	0	0	0	1	1	0	0	0
inter2x290	Organic	S. simulans	210531_21-06939_inter2x290_S26_L000_R1_001	0	0	0	0	0	0	0	0	0	0	0	0	0	0	0	0	0	0	0	0	0	0	0	0	0	0	0	0	0	0	0	0	0	0	0	0	0	0	0	0	0	0	0	0	0	0
inter2x293	Organic	S. simulans	210531_21-06940_inter2x293_S27_L000_R1_001	0	0	0	0	0	0	0	0	0	0	0	0	0	0	0	0	0	0	0	0	0	0	0	0	0	0	0	0	0	0	0	0	0	0	0	0	0	0	0	0	0	0	0	0	0	0
inter2x296	Organic	S. xylosus	210531_21-06941_inter2x296_S28_L000_R1_001	0	0	0	0	0	0	0	0	0	0	0	0	0	0	0	0	0	0	0	0	0	0	0	0	0	0	0	0	0	0	0	0	0	0	0	0	0	0	0	0	0	1	1	1	0	1
inter2x297	Organic	S. pasteuri	210531_21-06942_inter2x297_S29_L000_R1_001	0	0	0	0	0	0	1	0	0	0	0	0	0	0	0	0	1	0	0	0	0	0	0	0	0	0	0	0	0	0	0	0	0	0	0	0	0	0	0	0	0	1	1	0	0	0
inter2x300	Organic	S. xylosus	210531_21-06943_inter2x300_S30_L000_R1_001	0	0	0	0	0	0	0	0	1	0	0	0	0	0	0	0	0	0	0	0	0	0	0	0	0	0	0	0	0	0	0	0	0	0	0	0	0	0	0	0	0	1	0	1	0	1
inter2x301	Organic	S. saprophyticus	210531_21-06944_inter2x301_S31_L000_R1_001	0	0	0	0	0	0	0	0	0	1	0	0	0	0	0	0	0	0	0	0	0	0	0	0	0	0	0	0	0	0	0	0	0	0	0	0	0	0	0	0	0	1	1	0	0	0
inter2x303	Organic	S. cohnii	210531_21-06945_inter2x303_S32_L000_R1_001	0	0	0	0	0	0	0	0	0	0	1	0	0	0	0	0	0	0	0	0	0	0	0	0	1	0	0	0	0	0	0	0	0	1	0	0	0	0	0	0	0	1	0	0	0	0
inter2x304	Organic	S. xylosus	210531_21-06946_inter2x304_S33_L000_R1_001	0	0	0	0	0	0	0	0	0	0	0	0	0	0	0	0	0	0	0	0	0	0	0	0	0	0	0	0	0	0	0	0	0	0	0	0	0	0	0	0	0	0	0	0	0	0
inter2x308	Organic	S. haemolyticus	210531_21-06947_inter2x308_S34_L000_R1_001	0	0	0	0	0	0	0	0	0	0	0	0	0	0	0	0	0	0	0	0	0	0	0	0	0	0	0	0	0	0	0	0	0	0	0	0	0	0	0	0	0	1	1	0	0	0
inter2x365	Organic	S. simulans	inter2x365_S154_L000_R1_001	0	0	0	0	0	0	0	0	0	0	0	0	0	0	0	0	0	0	0	0	0	0	0	0	0	0	0	0	0	0	0	0	0	0	0	0	0	0	0	0	0	0	0	0	0	0
inter2x366	Organic	S. simulans	inter2x366_S155_L000_R1_001	0	0	0	0	0	0	0	0	0	0	0	0	0	0	0	0	0	0	0	0	0	0	0	0	0	0	0	0	0	0	0	0	0	0	0	0	0	0	0	0	0	0	0	0	0	0
inter2x367	Organic	S. haemolyticus	inter2x367_S156_L000_R1_001	0	0	0	0	0	0	0	0	0	0	0	0	0	0	0	0	0	0	0	0	0	0	0	0	0	0	0	0	0	0	0	0	0	0	0	0	0	0	0	0	0	0	0	0	0	0
inter2x368	Organic	S. simulans	inter2x368_S157_L000_R1_001	0	0	0	0	0	0	0	0	0	0	0	0	0	0	0	0	0	0	0	0	0	0	0	0	0	0	0	0	0	0	0	0	0	1	0	0	0	0	0	0	0	0	0	0	0	0
inter2x371	Organic	S. xylosus	inter2x371_S160_L000_R1_001	0	0	0	0	0	0	0	0	1	0	0	0	0	0	0	0	0	0	0	0	0	0	0	0	0	0	0	0	0	0	0	0	0	0	0	0	0	0	0	0	0	1	1	1	0	1
inter2x377	Organic	S. xylosus	inter2x377_S163_L000_R1_001	0	0	0	0	0	0	0	0	0	0	0	0	0	0	0	0	0	0	0	0	0	0	0	0	0	0	0	0	0	0	0	0	0	0	0	0	0	0	0	0	0	1	1	1	0	1
inter2x383	Organic	S. xylosus	inter2x383_S168_L000_R1_001	0	0	0	0	0	0	0	0	0	0	0	1	0	0	0	0	0	0	0	0	0	0	0	0	0	0	0	0	0	0	0	0	0	0	0	0	0	0	0	0	0	1	0	0	0	1
[truncated: 4 more columns]
